# Supplementary material for: A Lachnospiraceae-dominated bacterial signature in the fecal microbiota of HIV-infected individuals from Colombia, South America
Source: PubMed Central journal article supplement (PMC5852036; doi:10.1038/s41598-018-22629-7), 2018-03-14
Supplement: 41598_2018_22629_MOESM1_ESM.pdf [file 41598_2018_22629_MOESM1_ESM.pdf]

## SUPPLEMENTARY INFORMATION

**A Lachnospiraceae-dominated bacterial signature in the fecal microbiota of HIV-infected individuals from Colombia, South America.**

**Homero San-Juan-Vergara\*<sup>1</sup>, Eduardo Zurek<sup>2</sup>, Nadim J. Ajami<sup>3</sup>, Christian Mogollon<sup>4</sup>, Mario Peña<sup>1</sup>, Ivan Portnoy<sup>2</sup>, Jorge I. Velez<sup>2</sup>, Christian Cadena-Cruz<sup>1</sup>, Yirys Diaz-Olmos<sup>1</sup>, Leidy Hurtado-Gómez<sup>1</sup>, Silvana Sanchez-Sit<sup>5</sup>, Danitza Hernández<sup>4</sup>, Irina Urruchurtu<sup>4</sup>, Pierina Di-Ruggiero<sup>4</sup>, Ella Guardo-García<sup>6</sup>, Nury Torres<sup>6</sup>, Oscar Vidal-Orjuela<sup>1</sup>, Diego Viasus<sup>1</sup>, Joseph F. Petrosino<sup>3</sup>, Guillermo Cervantes-Acosta\*<sup>1</sup>.**

**1. División Ciencias de la Salud. Fundación Universidad del Norte, Colombia**

**2. División de Ingenierías. Fundación Universidad del Norte, Colombia**

**3. Alkek Center for Metagenomics and Microbiome Research, Department of Molecular Virology and Microbiology, Baylor College of Medicine. Houston, Texas, USA**

**4. IPS Medicina Integral, Colombia**

**5. Maestría en Estadística Aplicada. Universidad del Norte, Colombia.**

**6. IPS de la Costa, Colombia**

\* Homero Gabriel San-Juan-Vergara, Professor Department of Medicine. Division of Health Sciences. Universidad del Norte. E-mail: [hsanjuan@uninorte.edu.co](mailto:hsanjuan@uninorte.edu.co)

\* Guillermo Cervantes-Acosta, Professor Department of Medicine. Division of Health Sciences. Universidad del Norte. E-mail: [quicerva@uninorte.edu.co](mailto:quicerva@uninorte.edu.co)

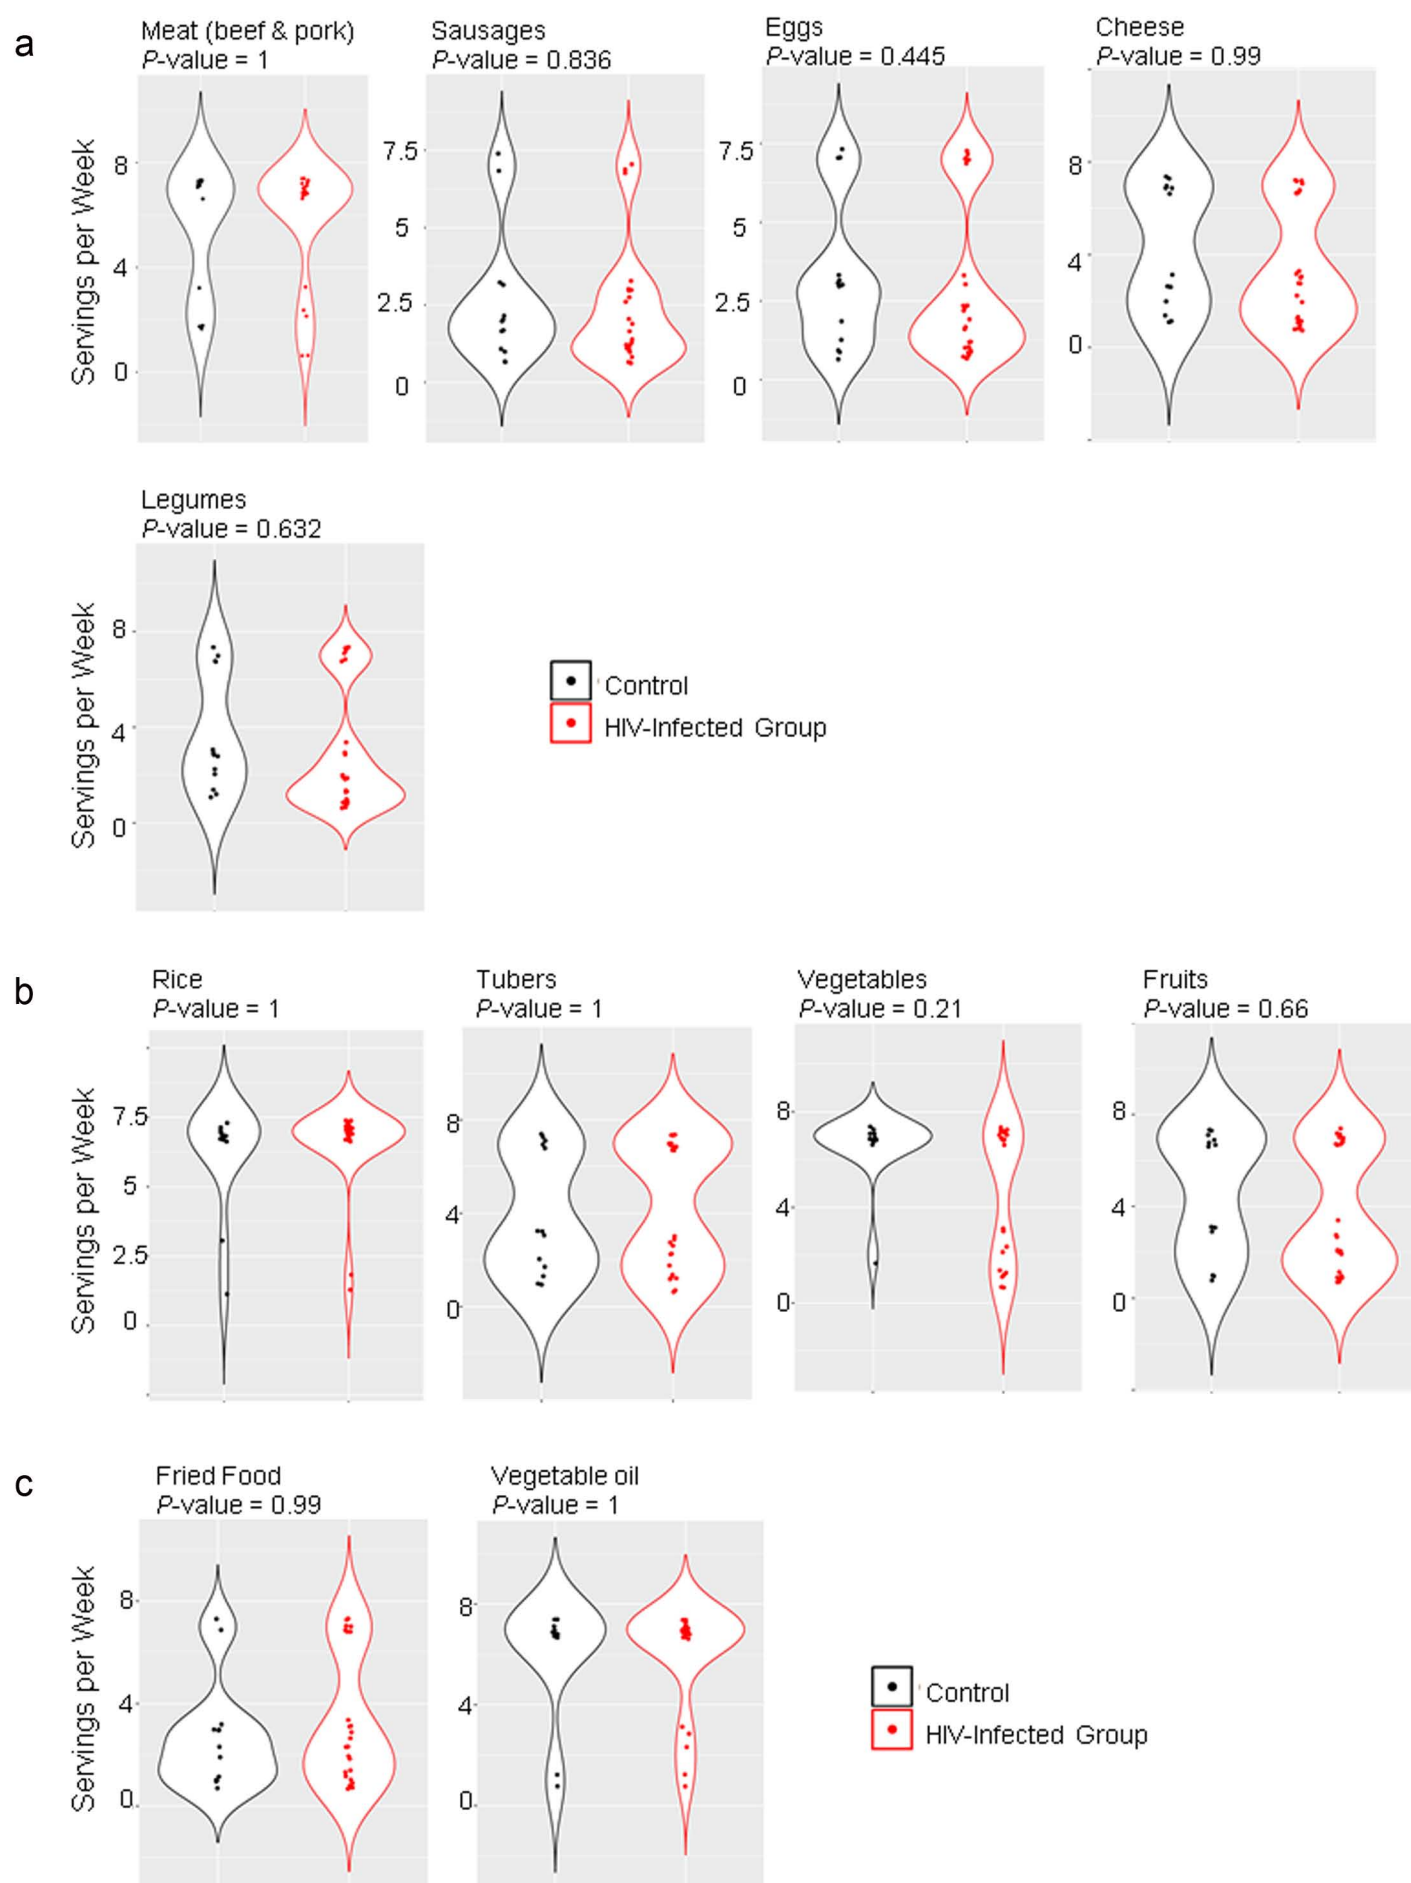

**Supplementary Figure S1.** Similar diet composition between control individuals and HIV-infected group. (a) Protein consumption in servings per week. (b) Carbohydrates consumption in servings per week. (c) Fat consumption in servings per week.  $P$ -value was calculated using two-sample Kolmogorov-Smirnov test.

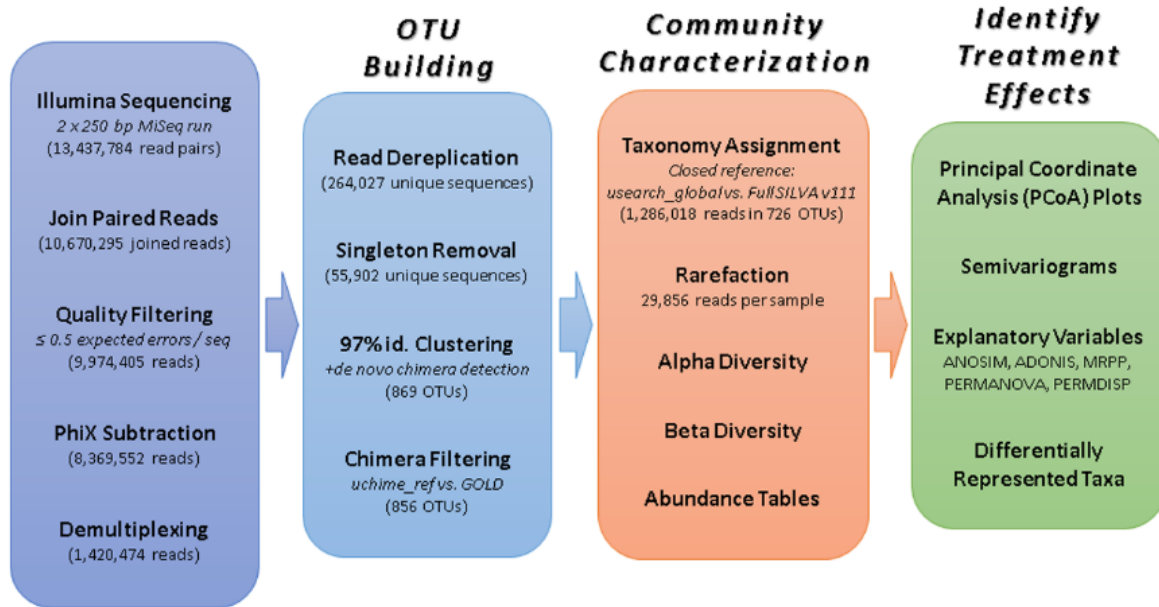

**Supplementary Figure S2.** Workflow for assigning taxonomies and constructing abundance tables.

**a**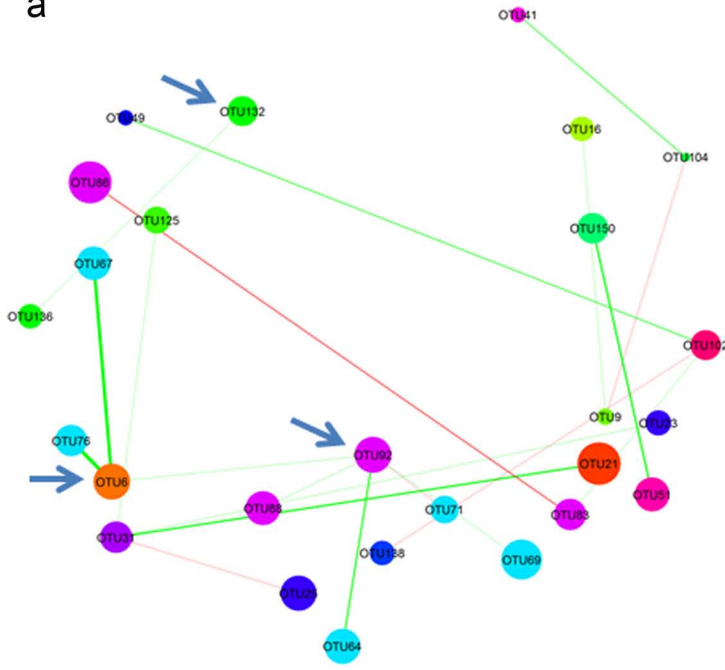

CONTROL

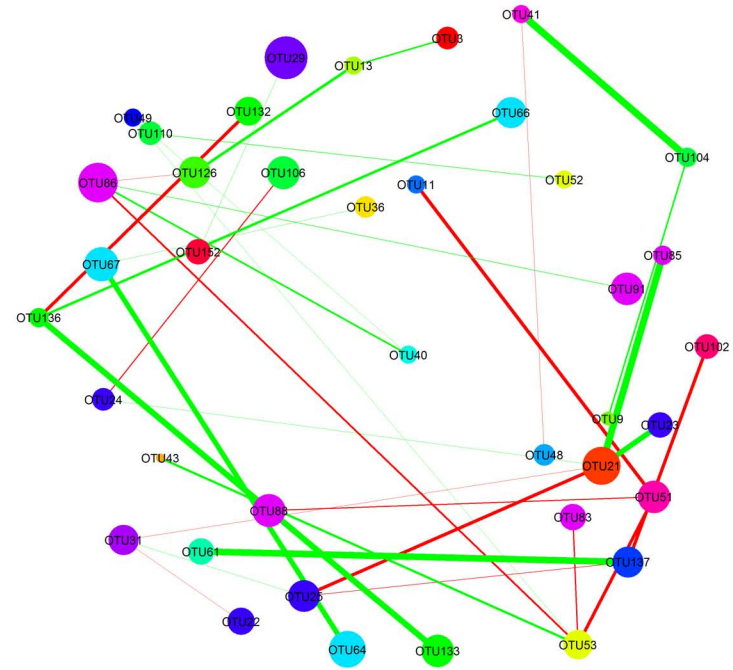

HIV-INFECTED GROUP

**b**

CLUSTER SIZE DISTRIBUTIONS

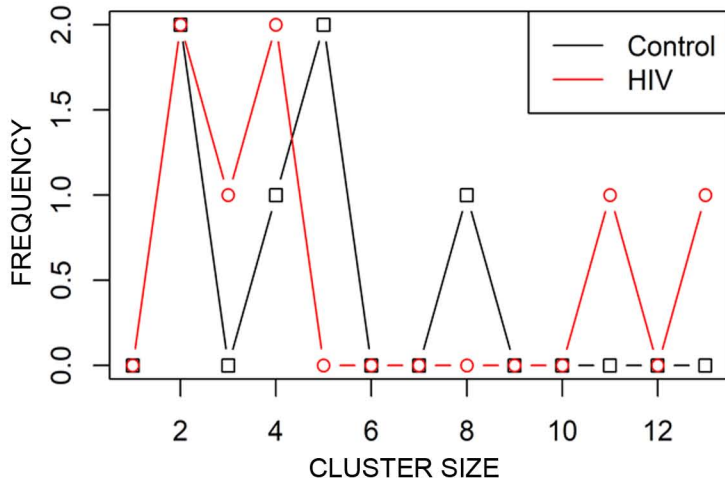**c**

EDGE DISTRIBUTIONS

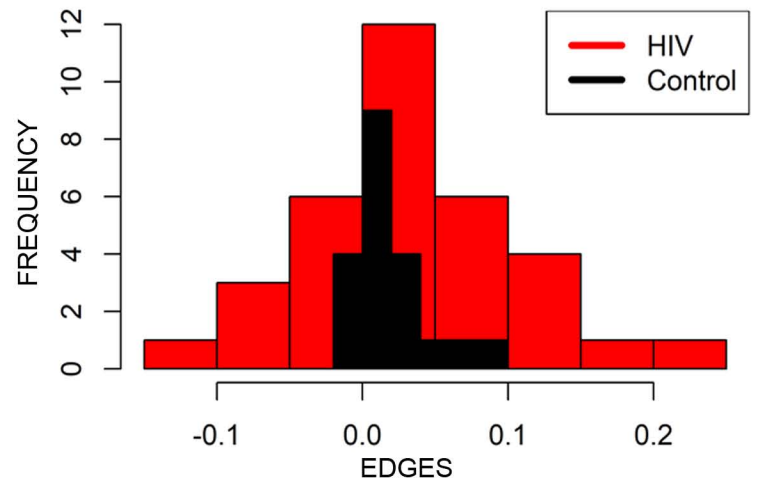**d** DEGREE DISTRIBUTIONS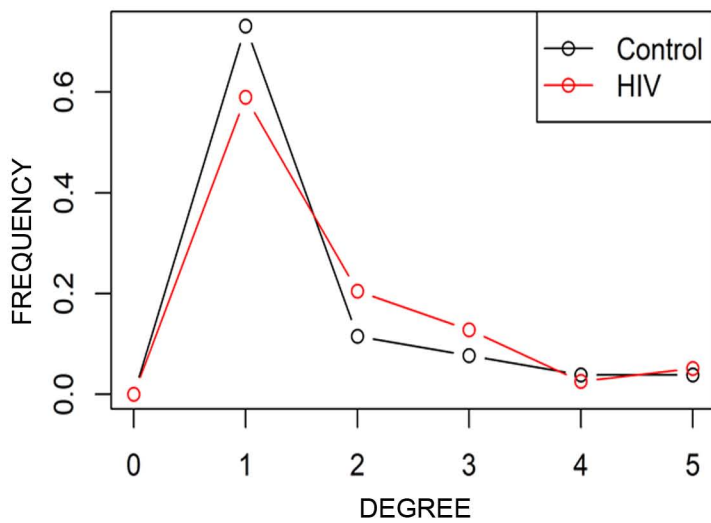

**Supplementary Figure S3.** Networks structure and analysis. (a) Networks whose nodes were fixed in their positions. Arrows indicate those OTUs that disappear in HIV-infected network. (b) Cluster size distributions. (c) Edge distributions. (d) Degree distributions

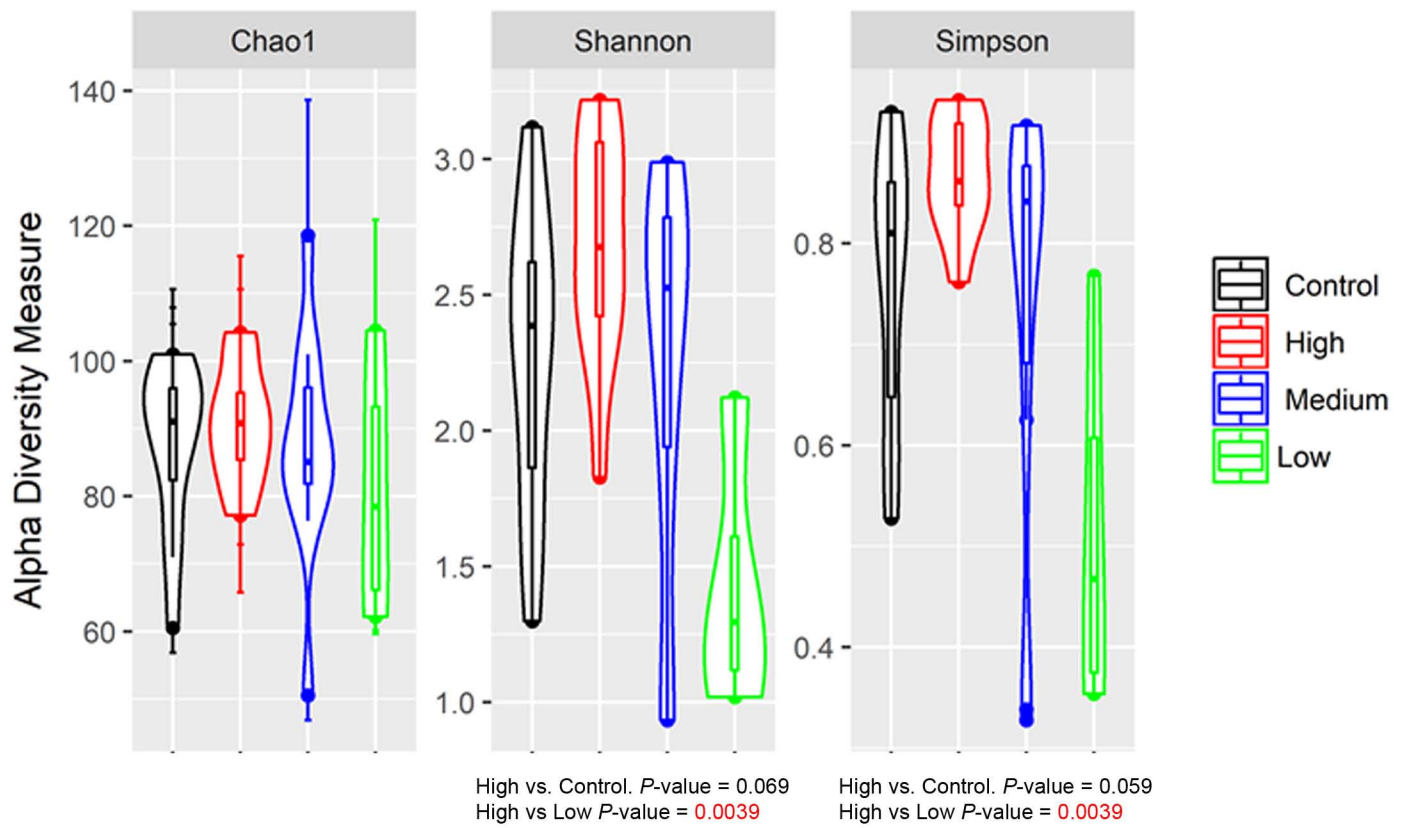

**Supplementary Figure S4.** Comparison of alpha-diversity indexes among subgroups.  $P$ -value was calculated using Mann-Whitney-Wilcoxon test.

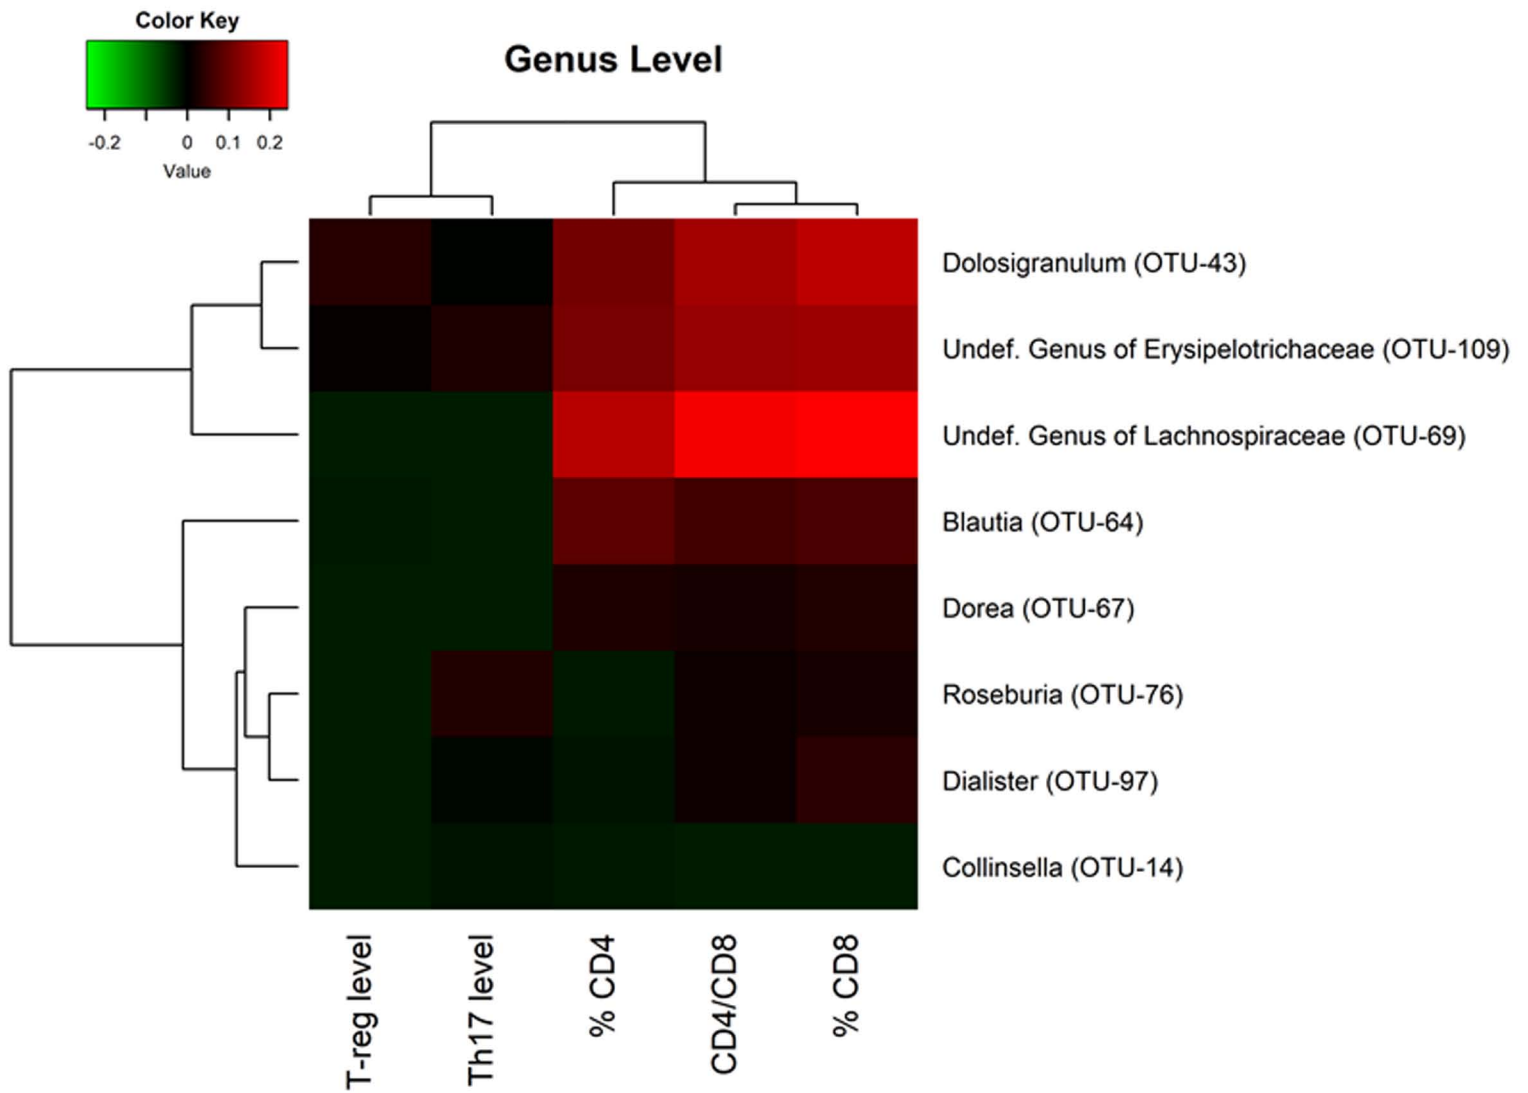

**Supplementary Figure S5.** Clustergram showing correlations of immune parameters with OTUs identified as the features able to separate Control group and HIV-infected group.

**Supplementary Table S1. Alpha diversity (Observed Species, Chao Index, Shannon Index) for each of the fecal samples.**

| <b>SAMPLE ID</b> | <b>Observed Species</b> | <b>Chao</b> | <b>Shannon</b> |
|------------------|-------------------------|-------------|----------------|
| C.27             | 762                     | 1045        | 6.81           |
| V.10             | 738                     | 1003        | 6.52           |
| V.26             | 724                     | 1022        | 6.48           |
| C.10             | 693                     | 988         | 6.49           |
| V.02             | 661                     | 956         | 6.20           |
| C.26             | 654                     | 910         | 6.44           |
| V.24             | 653                     | 893         | 6.53           |
| V.17             | 641                     | 959         | 5.75           |
| V.16             | 617                     | 828         | 5.84           |
| V.06             | 614                     | 786         | 6.27           |
| V.09             | 613                     | 787         | 6.01           |
| V.13             | 596                     | 872         | 5.52           |
| V.19             | 573                     | 810         | 6.04           |
| V.12             | 570                     | 753         | 5.75           |
| V.11             | 549                     | 730         | 6.07           |
| C.05             | 528                     | 722         | 5.01           |
| V.01             | 514                     | 747         | 4.81           |
| V.14             | 509                     | 809         | 4.57           |
| V.18             | 502                     | 740         | 5.26           |
| V.05             | 499                     | 742         | 5.03           |
| V.15             | 496                     | 708         | 5.48           |
| C.14             | 495                     | 708         | 4.86           |
| C.01             | 479                     | 735         | 4.67           |
| C.02             | 474                     | 692         | 5.41           |
| V.23             | 441                     | 590         | 5.26           |
| C.24             | 437                     | 611         | 5.46           |
| V.04             | 427                     | 614         | 4.72           |
| V.08             | 412                     | 615         | 4.21           |
| C.23             | 386                     | 557         | 4.68           |
| C.25             | 350                     | 481         | 4.63           |
| C.09             | 342                     | 566         | 4.42           |
| V.20             | 304                     | 505         | 3.68           |



| <b>SAMPLE ID</b> | <b>Observed Species</b> | <b>Chao</b> | <b>Shannon</b> |
|------------------|-------------------------|-------------|----------------|
| V.25             | 283                     | 429         | 4.14           |
| V.27             | 274                     | 451         | 3.82           |
| V.07             | 255                     | 329         | 3.84           |
| V.03             | 222                     | 368         | 3.47           |
| C.04             | 182                     | 261         | 3.72           |

**Supplementary Table S2. Code-labeling for each OTU / Taxon**

| <b>Taxon</b>                                                                                         | <b>CODE</b> |
|------------------------------------------------------------------------------------------------------|-------------|
| Archaea; Euryarchaeota; Methanobacteria; Methanobacteriales; Methanobacteriaceae; Methanobrevibacter | 1           |
| Archaea; Euryarchaeota; Methanobacteria; Methanobacteriales; Methanobacteriaceae; Methanosphaera     | 2           |
| Bacteria; Actinobacteria; Actinobacteria; Actinomycetales; Actinomycetaceae; Actinomyces             | 3           |
| Bacteria; Actinobacteria; Actinobacteria; Actinomycetales; Actinomycetaceae; Varibaculum             | 4           |
| Bacteria; Actinobacteria; Actinobacteria; Bifidobacteriales; Bifidobacteriaceae; Alloscardovia       | 5           |
| Bacteria; Actinobacteria; Actinobacteria; Bifidobacteriales; Bifidobacteriaceae; Bifidobacterium     | 6           |
| Bacteria; Actinobacteria; Actinobacteria; Bifidobacteriales; Bifidobacteriaceae; Gardnerella         | 7           |
| Bacteria; Actinobacteria; Actinobacteria; Bifidobacteriales; Bifidobacteriaceae; Scardovia           | 8           |
| Bacteria; Actinobacteria; Actinobacteria; Corynebacteriales; Corynebacteriaceae; Corynebacterium     | 9           |
| Bacteria; Actinobacteria; Actinobacteria; Micrococcales; Micrococcaceae; Kocuria                     | 10          |
| Bacteria; Actinobacteria; Actinobacteria; Micrococcales; Micrococcaceae; Rothia                      | 11          |
| Bacteria; Actinobacteria; Coriobacteriia; Coriobacteriales; Coriobacteriaceae; Adlercreutzia         | 12          |
| Bacteria; Actinobacteria; Coriobacteriia; Coriobacteriales; Coriobacteriaceae; Atopobium             | 13          |
| Bacteria; Actinobacteria; Coriobacteriia; Coriobacteriales; Coriobacteriaceae; Collinsella           | 14          |
| Bacteria; Actinobacteria; Coriobacteriia; Coriobacteriales; Coriobacteriaceae; Eggerthella           | 15          |
| Bacteria; Actinobacteria; Coriobacteriia; Coriobacteriales; Coriobacteriaceae; Enterorhabdus         | 16          |
| Bacteria; Actinobacteria; Coriobacteriia; Coriobacteriales; Coriobacteriaceae; g                     | 17          |
| Bacteria; Actinobacteria; Coriobacteriia; Coriobacteriales; Coriobacteriaceae; Gordonibacter         | 18          |
| Bacteria; Actinobacteria; Coriobacteriia; Coriobacteriales; Coriobacteriaceae; Olsenella             | 19          |
| Bacteria; Actinobacteria; Coriobacteriia; Coriobacteriales; Coriobacteriaceae; Slackia               | 20          |
| Bacteria; Bacteroidetes; Bacteroidia; Bacteroidales; Bacteroidaceae; Bacteroides                     | 21          |
| Bacteria; Bacteroidetes; Bacteroidia; Bacteroidales; Porphyromonadaceae; Barnesiella                 | 22          |
| Bacteria; Bacteroidetes; Bacteroidia; Bacteroidales; Porphyromonadaceae; Butyricimonas               | 23          |
| Bacteria; Bacteroidetes; Bacteroidia; Bacteroidales; Porphyromonadaceae; Odoribacter                 | 24          |
| Bacteria; Bacteroidetes; Bacteroidia; Bacteroidales; Porphyromonadaceae; Parabacteroides             | 25          |
| Bacteria; Bacteroidetes; Bacteroidia; Bacteroidales; Porphyromonadaceae; Porphyromonas               | 26          |
| Bacteria; Bacteroidetes; Bacteroidia; Bacteroidales; Prevotellaceae; g                               | 27          |

| <b>Taxon</b>                                                                                | <b>CODE</b> |
|---------------------------------------------------------------------------------------------|-------------|
| Bacteria; Bacteroidetes; Bacteroidia; Bacteroidales; Prevotellaceae; Paraprevotella         | 28          |
| Bacteria; Bacteroidetes; Bacteroidia; Bacteroidales; Prevotellaceae; Prevotella             | 29          |
| Bacteria; Bacteroidetes; Bacteroidia; Bacteroidales; RF16; g                                | 30          |
| Bacteria; Bacteroidetes; Bacteroidia; Bacteroidales; Rikenellaceae; Alistipes               | 31          |
| Bacteria; Bacteroidetes; Bacteroidia; Bacteroidales; Rikenellaceae; RC9_gut_group           | 32          |
| Bacteria; Bacteroidetes; Bacteroidia; Bacteroidales; S24-7; g                               | 33          |
| Bacteria; Bacteroidetes; Bacteroidia; Bacteroidales; uncultured; g                          | 34          |
| Bacteria; Cyanobacteria; 4C0d-2; o; f; g                                                    | 35          |
| Bacteria; Cyanobacteria; Chloroplast; Chloroplast; Chloroplast; Chloroplast                 | 36          |
| Bacteria; Elusimicrobia; Elusimicrobia; Elusimicrobiales; Elusimicrobiaceae; Elusimicrobium | 37          |
| Bacteria; Firmicutes; Bacilli; Bacillales; Bacillaceae; Bacillus                            | 38          |
| Bacteria; Firmicutes; Bacilli; Bacillales; Bacillaceae; Geobacillus                         | 39          |
| Bacteria; Firmicutes; Bacilli; Bacillales; Family XI Incertae Sedis; Gemella                | 40          |
| Bacteria; Firmicutes; Bacilli; Bacillales; Staphylococcaceae; Staphylococcus                | 41          |
| Bacteria; Firmicutes; Bacilli; Lactobacillales; Aerococcaceae; Abiotrophia                  | 42          |
| Bacteria; Firmicutes; Bacilli; Lactobacillales; Carnobacteriaceae; Dolosigranulum           | 43          |
| Bacteria; Firmicutes; Bacilli; Lactobacillales; Enterococcaceae; Enterococcus               | 44          |
| Bacteria; Firmicutes; Bacilli; Lactobacillales; Lactobacillaceae; Lactobacillus             | 45          |
| Bacteria; Firmicutes; Bacilli; Lactobacillales; Leuconostocaceae; Fructobacillus            | 46          |
| Bacteria; Firmicutes; Bacilli; Lactobacillales; Leuconostocaceae; Leuconostoc               | 47          |
| Bacteria; Firmicutes; Bacilli; Lactobacillales; Leuconostocaceae; Weissella                 | 48          |
| Bacteria; Firmicutes; Bacilli; Lactobacillales; PeH08; g                                    | 49          |
| Bacteria; Firmicutes; Bacilli; Lactobacillales; Streptococcaceae; Lactococcus               | 50          |
| Bacteria; Firmicutes; Bacilli; Lactobacillales; Streptococcaceae; Streptococcus             | 51          |
| Bacteria; Firmicutes; Clostridia; Clostridiales; Christensenellaceae; Christensenella       | 52          |
| Bacteria; Firmicutes; Clostridia; Clostridiales; Christensenellaceae; g                     | 53          |
| Bacteria; Firmicutes; Clostridia; Clostridiales; Clostridiaceae; Clostridium                | 54          |

| <b>Taxon</b>                                                                                | <b>CODE</b> |
|---------------------------------------------------------------------------------------------|-------------|
| Bacteria; Firmicutes; Clostridia; Clostridiales; Clostridiaceae; Sarcina                    | 55          |
| Bacteria; Firmicutes; Clostridia; Clostridiales; Eubacteriaceae; Eubacterium                | 56          |
| Bacteria; Firmicutes; Clostridia; Clostridiales; Family XI Incertae Sedis; Anaerococcus     | 57          |
| Bacteria; Firmicutes; Clostridia; Clostridiales; Family XI Incertae Sedis; Finegoldia       | 58          |
| Bacteria; Firmicutes; Clostridia; Clostridiales; Family XI Incertae Sedis; Parvimonas       | 59          |
| Bacteria; Firmicutes; Clostridia; Clostridiales; Family XI Incertae Sedis; Peptoniphilus    | 60          |
| Bacteria; Firmicutes; Clostridia; Clostridiales; Family XIII Incertae Sedis; Incertae Sedis | 61          |
| Bacteria; Firmicutes; Clostridia; Clostridiales; Family XIII Incertae Sedis; Mogibacterium  | 62          |
| Bacteria; Firmicutes; Clostridia; Clostridiales; Lachnospiraceae; Anaerostipes              | 63          |
| Bacteria; Firmicutes; Clostridia; Clostridiales; Lachnospiraceae; Blautia                   | 64          |
| Bacteria; Firmicutes; Clostridia; Clostridiales; Lachnospiraceae; Butyrivibrio              | 65          |
| Bacteria; Firmicutes; Clostridia; Clostridiales; Lachnospiraceae; Coprococcus               | 66          |
| Bacteria; Firmicutes; Clostridia; Clostridiales; Lachnospiraceae; Dorea                     | 67          |
| Bacteria; Firmicutes; Clostridia; Clostridiales; Lachnospiraceae; Howardella                | 68          |
| Bacteria; Firmicutes; Clostridia; Clostridiales; Lachnospiraceae; Incertae Sedis            | 69          |
| Bacteria; Firmicutes; Clostridia; Clostridiales; Lachnospiraceae; Johnsonella               | 70          |
| Bacteria; Firmicutes; Clostridia; Clostridiales; Lachnospiraceae; Lachnospira               | 71          |
| Bacteria; Firmicutes; Clostridia; Clostridiales; Lachnospiraceae; Marvinbryantia            | 72          |
| Bacteria; Firmicutes; Clostridia; Clostridiales; Lachnospiraceae; Moryella                  | 73          |
| Bacteria; Firmicutes; Clostridia; Clostridiales; Lachnospiraceae; Oribacterium              | 74          |
| Bacteria; Firmicutes; Clostridia; Clostridiales; Lachnospiraceae; Pseudobutyrvibrio         | 75          |
| Bacteria; Firmicutes; Clostridia; Clostridiales; Lachnospiraceae; Roseburia                 | 76          |
| Bacteria; Firmicutes; Clostridia; Clostridiales; Lachnospiraceae; Shuttleworthia            | 77          |
| Bacteria; Firmicutes; Clostridia; Clostridiales; Peptococcaceae; g                          | 78          |
| Bacteria; Firmicutes; Clostridia; Clostridiales; Peptococcaceae; Peptococcus                | 79          |

| <b>Taxon</b>                                                                                    | <b>CODE</b> |
|-------------------------------------------------------------------------------------------------|-------------|
| Bacteria; Firmicutes; Clostridia; Clostridiales; Peptostreptococcaceae; Incertae Sedis          | 80          |
| Bacteria; Firmicutes; Clostridia; Clostridiales; Peptostreptococcaceae; Peptostreptococcus      | 81          |
| Bacteria; Firmicutes; Clostridia; Clostridiales; Ruminococcaceae; Acetanaerobacterium           | 82          |
| Bacteria; Firmicutes; Clostridia; Clostridiales; Ruminococcaceae; Anaerotruncus                 | 83          |
| Bacteria; Firmicutes; Clostridia; Clostridiales; Ruminococcaceae; Faecalibacterium              | 84          |
| Bacteria; Firmicutes; Clostridia; Clostridiales; Ruminococcaceae; Flavonifractor                | 85          |
| Bacteria; Firmicutes; Clostridia; Clostridiales; Ruminococcaceae; g                             | 86          |
| Bacteria; Firmicutes; Clostridia; Clostridiales; Ruminococcaceae; Hydrogenoanaerobacterium      | 87          |
| Bacteria; Firmicutes; Clostridia; Clostridiales; Ruminococcaceae; Incertae Sedis                | 88          |
| Bacteria; Firmicutes; Clostridia; Clostridiales; Ruminococcaceae; Oscillibacter                 | 89          |
| Bacteria; Firmicutes; Clostridia; Clostridiales; Ruminococcaceae; Oscillospira                  | 90          |
| Bacteria; Firmicutes; Clostridia; Clostridiales; Ruminococcaceae; Ruminococcus                  | 91          |
| Bacteria; Firmicutes; Clostridia; Clostridiales; Ruminococcaceae; Subdoligranulum               | 92          |
| Bacteria; Firmicutes; Clostridia; Clostridiales; uncultured; g                                  | 93          |
| Bacteria; Firmicutes; Clostridia; Clostridiales; Veillonellaceae; Acidaminococcus               | 94          |
| Bacteria; Firmicutes; Clostridia; Clostridiales; Veillonellaceae; Allisonella                   | 95          |
| Bacteria; Firmicutes; Clostridia; Clostridiales; Veillonellaceae; Anaerovibrio                  | 96          |
| Bacteria; Firmicutes; Clostridia; Clostridiales; Veillonellaceae; Dialister                     | 97          |
| Bacteria; Firmicutes; Clostridia; Clostridiales; Veillonellaceae; Megamonas                     | 98          |
| Bacteria; Firmicutes; Clostridia; Clostridiales; Veillonellaceae; Megasphaera                   | 99          |
| Bacteria; Firmicutes; Clostridia; Clostridiales; Veillonellaceae; Mitsukella                    | 100         |
| Bacteria; Firmicutes; Clostridia; Clostridiales; Veillonellaceae; Phascolarctobacterium         | 101         |
| Bacteria; Firmicutes; Clostridia; Clostridiales; Veillonellaceae; Veillonella                   | 102         |
| Bacteria; Firmicutes; Clostridia; Thermoanaerobacteriales; Thermoanaerobacteraceae; Gelria      | 103         |
| Bacteria; Firmicutes; Erysipelotrichi; Erysipelotrichales; Erysipelotrichaceae; Allobaculum     | 104         |
| Bacteria; Firmicutes; Erysipelotrichi; Erysipelotrichales; Erysipelotrichaceae; Asteroleplasma  | 105         |
| Bacteria; Firmicutes; Erysipelotrichi; Erysipelotrichales; Erysipelotrichaceae; Catenibacterium | 106         |

| <b>Taxon</b>                                                                                               | <b>CODE</b> |
|------------------------------------------------------------------------------------------------------------|-------------|
| Bacteria; Firmicutes; Erysipelotrichi; Erysipelotrichales; Erysipelotrichaceae; g                          | 107         |
| Bacteria; Firmicutes; Erysipelotrichi; Erysipelotrichales; Erysipelotrichaceae; Holdemania                 | 108         |
| Bacteria; Firmicutes; Erysipelotrichi; Erysipelotrichales; Erysipelotrichaceae; Incertae Sedis             | 109         |
| Bacteria; Firmicutes; Erysipelotrichi; Erysipelotrichales; Erysipelotrichaceae; Solobacterium              | 110         |
| Bacteria; Firmicutes; Erysipelotrichi; Erysipelotrichales; Erysipelotrichaceae; Turicibacter               | 111         |
| Bacteria; Fusobacteria; Fusobacteria; Fusobacteriales; Fusobacteriaceae; Cetobacterium                     | 112         |
| Bacteria; Fusobacteria; Fusobacteria; Fusobacteriales; Fusobacteriaceae; Fusobacterium                     | 113         |
| Bacteria; Fusobacteria; Fusobacteria; Fusobacteriales; Leptotrichiaceae; Leptotrichia                      | 114         |
| Bacteria; Fusobacteria; Fusobacteria; Fusobacteriales; Leptotrichiaceae; Sneathia                          | 115         |
| Bacteria; Lentisphaerae; Lentisphaeria; Victivallales; Victivallaceae; Victivallis                         | 116         |
| Bacteria; Proteobacteria; Alphaproteobacteria; Rhodospirillales; Acetobacteraceae; Gluconobacter           | 117         |
| Bacteria; Proteobacteria; Alphaproteobacteria; Rhodospirillales; Rhodospirillaceae; Thalassospira          | 118         |
| Bacteria; Proteobacteria; Alphaproteobacteria; Rickettsiales; mitochondria; g                              | 119         |
| Bacteria; Proteobacteria; Betaproteobacteria; Burkholderiales; Alcaligenaceae; Parasutterella              | 120         |
| Bacteria; Proteobacteria; Betaproteobacteria; Burkholderiales; Alcaligenaceae; Sutterella                  | 121         |
| Bacteria; Proteobacteria; Betaproteobacteria; Burkholderiales; Comamonadaceae; Comamonas                   | 122         |
| Bacteria; Proteobacteria; Betaproteobacteria; Burkholderiales; Oxalobacteraceae; Oxalobacter               | 123         |
| Bacteria; Proteobacteria; Betaproteobacteria; Neisseriales; Neisseriaceae; Neisseria                       | 124         |
| Bacteria; Proteobacteria; Deltaproteobacteria; Desulfovibrionales; Desulfovibrionaceae; Bilophila          | 125         |
| Bacteria; Proteobacteria; Deltaproteobacteria; Desulfovibrionales; Desulfovibrionaceae; Desulfovibrio      | 126         |
| Bacteria; Proteobacteria; Epsilonproteobacteria; Campylobacterales; Campylobacteraceae; Campylobacter      | 127         |
| Bacteria; Proteobacteria; Epsilonproteobacteria; Campylobacterales; Helicobacteraceae; Helicobacter        | 128         |
| Bacteria; Proteobacteria; Gammaproteobacteria; Aeromonadales; Succinivibrionaceae; Anaerobiospirillum      | 129         |
| Bacteria; Proteobacteria; Gammaproteobacteria; Aeromonadales; Succinivibrionaceae; Ruminobacter            | 130         |
| Bacteria; Proteobacteria; Gammaproteobacteria; Aeromonadales; Succinivibrionaceae; Succinivibrio           | 131         |
| Bacteria; Proteobacteria; Gammaproteobacteria; Enterobacteriales; Enterobacteriaceae; Enterobacter         | 132         |
| Bacteria; Proteobacteria; Gammaproteobacteria; Enterobacteriales; Enterobacteriaceae; Escherichia-Shigella | 133         |

| <b>Taxon</b>                                                                                       | <b>CODE</b> |
|----------------------------------------------------------------------------------------------------|-------------|
| Bacteria; Proteobacteria; Gammaproteobacteria; Enterobacteriales; Enterobacteriaceae; Proteus      | 134         |
| Bacteria; Proteobacteria; Gammaproteobacteria; Enterobacteriales; Enterobacteriaceae; Providencia  | 135         |
| Bacteria; Proteobacteria; Gammaproteobacteria; Enterobacteriales; Enterobacteriaceae; Yersinia     | 136         |
| Bacteria; Proteobacteria; Gammaproteobacteria; Pasteurellales; Pasteurellaceae; Actinobacillus     | 137         |
| Bacteria; Proteobacteria; Gammaproteobacteria; Pasteurellales; Pasteurellaceae; Haemophilus        | 138         |
| Bacteria; Proteobacteria; Gammaproteobacteria; Pseudomonadales; Moraxellaceae; Acinetobacter       | 139         |
| Bacteria; Proteobacteria; Gammaproteobacteria; Pseudomonadales; Moraxellaceae; Enhydrobacter       | 140         |
| Bacteria; Proteobacteria; Gammaproteobacteria; Pseudomonadales; Moraxellaceae; Moraxella           | 141         |
| Bacteria; Proteobacteria; Gammaproteobacteria; Pseudomonadales; Moraxellaceae; Psychrobacter       | 142         |
| Bacteria; Proteobacteria; Gammaproteobacteria; Pseudomonadales; Pseudomonadaceae; Pseudomonas      | 143         |
| Bacteria; Proteobacteria; Gammaproteobacteria; Xanthomonadales; Xanthomonadaceae; Stenotrophomonas | 144         |
| Bacteria; RF3; c; o; f; g                                                                          | 145         |
| Bacteria; Spirochaetes; Spirochaetes; Spirochaetales; Spirochaetaceae; Treponema                   | 146         |
| Bacteria; Synergistetes; Synergistia; Synergistales; Synergistaceae; Cloacibacillus                | 147         |
| Bacteria; Tenericutes; Mollicutes; Anaeroplasmatales; Anaeroplasmataceae; Anaeroplasma             | 148         |
| Bacteria; Tenericutes; Mollicutes; Mycoplasmatales; Mycoplasmataceae; Ureaplasma                   | 149         |
| Bacteria; Tenericutes; Mollicutes; RF9; f; g                                                       | 150         |
| Bacteria; Verrucomicrobia; Opitutae; vadinHA64; f; g                                               | 151         |
| Bacteria; Verrucomicrobia; Verrucomicrobiae; Verrucomicrobiales; Verrucomicrobiaceae; Akkermansia  | 152         |

**Supplementary Table S3. Bacterial Counts in HIV-infected patients with the highest percentage of activated CD4(+) T cells (>10% HIGH)**

| CODE | V.01 | V.03 | V.04 | V.06 | V.09 | V.10 | V.15  | V.19 | V.24 | V.26 |
|------|------|------|------|------|------|------|-------|------|------|------|
| 1    | 0    | 0    | 0    | 0    | 23   | 208  | 1     | 0    | 5    | 79   |
| 2    | 0    | 0    | 0    | 0    | 0    | 0    | 0     | 0    | 0    | 0    |
| 3    | 6    | 53   | 6    | 36   | 3    | 10   | 4     | 9    | 53   | 25   |
| 4    | 0    | 0    | 0    | 0    | 0    | 0    | 0     | 0    | 0    | 0    |
| 5    | 0    | 2    | 0    | 0    | 0    | 0    | 0     | 0    | 0    | 0    |
| 6    | 164  | 4    | 1    | 19   | 16   | 2670 | 696   | 73   | 2589 | 69   |
| 7    | 0    | 0    | 0    | 0    | 2    | 0    | 0     | 0    | 0    | 0    |
| 8    | 0    | 1    | 1    | 0    | 0    | 0    | 0     | 0    | 2    | 0    |
| 9    | 6    | 6    | 4    | 5    | 4    | 9    | 7     | 1    | 11   | 3    |
| 10   | 0    | 0    | 0    | 0    | 0    | 0    | 0     | 0    | 0    | 0    |
| 11   | 0    | 9    | 3    | 18   | 0    | 0    | 1     | 0    | 44   | 2    |
| 12   | 0    | 0    | 0    | 0    | 0    | 15   | 26    | 0    | 0    | 2    |
| 13   | 2    | 9    | 1    | 3    | 0    | 3    | 0     | 0    | 3    | 5    |
| 14   | 27   | 1    | 3    | 82   | 92   | 50   | 1     | 80   | 97   | 238  |
| 15   | 0    | 0    | 0    | 0    | 1    | 9    | 5     | 0    | 0    | 0    |
| 16   | 9    | 0    | 0    | 41   | 19   | 21   | 0     | 2    | 53   | 25   |
| 17   | 17   | 0    | 2    | 97   | 70   | 40   | 0     | 27   | 134  | 87   |
| 18   | 0    | 0    | 0    | 0    | 0    | 0    | 0     | 0    | 0    | 0    |
| 19   | 0    | 0    | 0    | 0    | 0    | 0    | 0     | 0    | 0    | 0    |
| 20   | 3    | 0    | 2    | 2    | 26   | 0    | 0     | 5    | 6    | 28   |
| 21   | 724  | 5    | 1068 | 273  | 51   | 6743 | 16709 | 4856 | 3181 | 229  |
| 22   | 9    | 0    | 428  | 0    | 1    | 1190 | 2102  | 0    | 33   | 0    |
| 23   | 54   | 0    | 70   | 16   | 0    | 51   | 53    | 55   | 0    | 26   |
| 24   | 60   | 0    | 0    | 108  | 1    | 275  | 165   | 20   | 45   | 5    |
| 25   | 144  | 1    | 490  | 46   | 75   | 344  | 1053  | 85   | 2209 | 44   |



| CODE | V.01  | V.03 | V.04 | V.06 | V.09 | V.10 | V.15 | V.19 | V.24 | V.26  |
|------|-------|------|------|------|------|------|------|------|------|-------|
| 26   | 0     | 0    | 0    | 253  | 0    | 3    | 0    | 379  | 2    | 0     |
| 27   | 106   | 2    | 791  | 517  | 291  | 48   | 50   | 259  | 1266 | 1457  |
| 28   | 312   | 0    | 0    | 0    | 0    | 0    | 0    | 0    | 50   | 5     |
| 29   | 10564 | 18   | 7863 | 7604 | 5011 | 189  | 6    | 4221 | 3947 | 11651 |
| 30   | 0     | 0    | 0    | 0    | 0    | 0    | 0    | 0    | 0    | 0     |
| 31   | 1158  | 0    | 251  | 143  | 23   | 1355 | 2932 | 47   | 548  | 4     |
| 32   | 388   | 0    | 1    | 4517 | 791  | 454  | 0    | 200  | 0    | 541   |
| 33   | 10    | 4    | 11   | 186  | 1387 | 10   | 2    | 597  | 666  | 192   |
| 34   | 116   | 0    | 0    | 0    | 403  | 0    | 203  | 58   | 0    | 222   |
| 35   | 0     | 0    | 0    | 36   | 8    | 0    | 0    | 0    | 76   | 75    |
| 36   | 7     | 126  | 1    | 2    | 0    | 3    | 0    | 0    | 0    | 2     |
| 37   | 0     | 0    | 0    | 25   | 0    | 0    | 0    | 2    | 0    | 0     |
| 38   | 2     | 1    | 1    | 2    | 0    | 1    | 2    | 2    | 4    | 1     |
| 39   | 0     | 0    | 0    | 0    | 0    | 0    | 0    | 0    | 0    | 0     |
| 40   | 0     | 14   | 1    | 6    | 0    | 2    | 1    | 39   | 12   | 2     |
| 41   | 8     | 4    | 17   | 6    | 7    | 14   | 11   | 14   | 12   | 1     |
| 42   | 0     | 0    | 1    | 1    | 0    | 0    | 0    | 0    | 0    | 0     |
| 43   | 1     | 0    | 2    | 2    | 3    | 1    | 3    | 7    | 3    | 2     |
| 44   | 1     | 14   | 1    | 2    | 0    | 2    | 3    | 1354 | 2    | 0     |
| 45   | 16    | 3    | 359  | 120  | 0    | 2    | 36   | 47   | 53   | 1     |
| 46   | 0     | 0    | 0    | 0    | 0    | 0    | 0    | 0    | 0    | 0     |
| 47   | 0     | 0    | 0    | 0    | 0    | 0    | 0    | 0    | 0    | 0     |
| 48   | 1     | 0    | 14   | 1    | 0    | 2    | 0    | 4    | 4    | 0     |
| 49   | 1     | 12   | 3    | 17   | 1    | 0    | 1    | 24   | 3    | 0     |
| 50   | 2     | 0    | 53   | 0    | 0    | 3    | 1    | 3    | 13   | 0     |
| 51   | 24    | 1558 | 395  | 2865 | 20   | 86   | 42   | 392  | 555  | 93    |
| 52   | 1     | 0    | 4    | 1    | 4    | 8    | 7    | 0    | 0    | 4     |

| CODE | V.01 | V.03 | V.04 | V.06 | V.09 | V.10 | V.15 | V.19 | V.24 | V.26 |
|------|------|------|------|------|------|------|------|------|------|------|
| 53   | 122  | 1    | 80   | 132  | 159  | 1403 | 223  | 37   | 106  | 290  |
| 54   | 134  | 9    | 266  | 626  | 4    | 270  | 61   | 10   | 0    | 408  |
| 55   | 21   | 0    | 0    | 0    | 17   | 0    | 0    | 4    | 0    | 9    |
| 56   | 0    | 0    | 0    | 0    | 0    | 0    | 0    | 0    | 0    | 0    |
| 57   | 0    | 0    | 0    | 0    | 0    | 1    | 0    | 16   | 0    | 0    |
| 58   | 0    | 0    | 0    | 0    | 0    | 7    | 0    | 1    | 4    | 0    |
| 59   | 0    | 0    | 0    | 0    | 1    | 2    | 2    | 1289 | 0    | 0    |
| 60   | 0    | 0    | 0    | 0    | 0    | 1    | 0    | 814  | 0    | 0    |
| 61   | 40   | 0    | 18   | 20   | 42   | 140  | 47   | 132  | 146  | 29   |
| 62   | 2    | 1    | 1    | 95   | 32   | 0    | 0    | 173  | 580  | 142  |
| 63   | 7    | 1    | 0    | 0    | 471  | 138  | 74   | 13   | 247  | 3    |
| 64   | 236  | 3213 | 205  | 285  | 928  | 1400 | 1347 | 341  | 776  | 359  |
| 65   | 0    | 0    | 0    | 683  | 205  | 0    | 0    | 73   | 202  | 410  |
| 66   | 98   | 1    | 23   | 197  | 176  | 614  | 15   | 167  | 390  | 169  |
| 67   | 117  | 2056 | 116  | 94   | 426  | 229  | 70   | 281  | 598  | 210  |
| 68   | 0    | 0    | 15   | 0    | 33   | 0    | 0    | 6    | 35   | 0    |
| 69   | 6938 | 513  | 449  | 2546 | 9495 | 1697 | 1184 | 2379 | 3932 | 2957 |
| 70   | 0    | 0    | 0    | 2    | 0    | 0    | 0    | 0    | 0    | 5    |
| 71   | 6    | 0    | 64   | 4    | 43   | 75   | 48   | 13   | 33   | 65   |
| 72   | 0    | 0    | 0    | 10   | 21   | 22   | 0    | 7    | 6    | 15   |
| 73   | 0    | 0    | 0    | 0    | 0    | 0    | 0    | 0    | 1    | 1    |
| 74   | 1    | 0    | 0    | 0    | 145  | 1    | 0    | 188  | 2    | 190  |
| 75   | 211  | 68   | 384  | 440  | 1104 | 0    | 163  | 129  | 733  | 772  |
| 76   | 107  | 119  | 53   | 304  | 459  | 244  | 82   | 186  | 805  | 527  |
| 77   | 0    | 0    | 0    | 0    | 0    | 10   | 36   | 0    | 0    | 0    |

| CODE | V.01 | V.03  | V.04 | V.06 | V.09 | V.10 | V.15 | V.19 | V.24 | V.26 |
|------|------|-------|------|------|------|------|------|------|------|------|
| 78   | 0    | 0     | 0    | 0    | 0    | 13   | 3    | 0    | 0    | 12   |
| 79   | 16   | 0     | 0    | 7    | 49   | 22   | 9    | 107  | 38   | 8    |
| 80   | 121  | 236   | 150  | 127  | 8    | 474  | 327  | 3    | 4    | 567  |
| 81   | 0    | 0     | 0    | 4    | 0    | 0    | 3    | 269  | 0    | 1    |
| 82   | 1    | 0     | 0    | 0    | 0    | 1    | 0    | 0    | 0    | 0    |
| 83   | 353  | 2     | 238  | 154  | 445  | 1583 | 50   | 10   | 75   | 423  |
| 84   | 674  | 4     | 412  | 946  | 2580 | 705  | 649  | 818  | 1143 | 2527 |
| 85   | 1    | 0     | 9    | 1    | 0    | 2    | 59   | 1    | 2    | 0    |
| 86   | 5923 | 6     | 2006 | 5029 | 6865 | 5163 | 3495 | 2112 | 3377 | 3452 |
| 87   | 0    | 0     | 2    | 3    | 0    | 3    | 0    | 0    | 0    | 0    |
| 88   | 101  | 0     | 78   | 159  | 456  | 1147 | 686  | 101  | 388  | 385  |
| 89   | 1    | 0     | 1    | 0    | 0    | 11   | 4    | 0    | 0    | 0    |
| 90   | 0    | 0     | 1    | 0    | 0    | 0    | 0    | 0    | 0    | 0    |
| 91   | 428  | 1     | 109  | 417  | 174  | 71   | 995  | 161  | 85   | 931  |
| 92   | 161  | 199   | 221  | 551  | 252  | 385  | 0    | 151  | 615  | 516  |
| 93   | 146  | 0     | 158  | 109  | 30   | 84   | 2    | 2    | 5    | 24   |
| 94   | 125  | 0     | 0    | 0    | 0    | 0    | 0    | 1    | 12   | 0    |
| 95   | 40   | 0     | 20   | 8    | 100  | 9    | 0    | 94   | 123  | 23   |
| 96   | 0    | 0     | 0    | 0    | 0    | 0    | 0    | 2    | 0    | 12   |
| 97   | 3646 | 22    | 9469 | 1316 | 2    | 486  | 1256 | 507  | 3636 | 1137 |
| 98   | 11   | 0     | 0    | 0    | 0    | 0    | 0    | 0    | 0    | 0    |
| 99   | 0    | 1     | 0    | 40   | 2    | 36   | 1    | 656  | 135  | 2    |
| 100  | 0    | 0     | 0    | 0    | 133  | 0    | 0    | 8    | 0    | 87   |
| 101  | 109  | 1     | 0    | 35   | 2242 | 635  | 755  | 499  | 0    | 95   |
| 102  | 21   | 12799 | 84   | 572  | 11   | 9    | 47   | 41   | 23   | 104  |
| 103  | 0    | 0     | 0    | 0    | 5    | 29   | 8    | 0    | 0    | 2    |
| 104  | 0    | 1     | 2    | 1    | 0    | 1    | 5    | 0    | 5    | 0    |

| CODE | V.01 | V.03 | V.04 | V.06 | V.09 | V.10 | V.15 | V.19 | V.24 | V.26 |
|------|------|------|------|------|------|------|------|------|------|------|
| 105  | 0    | 0    | 12   | 159  | 0    | 0    | 0    | 0    | 7    | 0    |
| 106  | 0    | 1    | 143  | 126  | 335  | 0    | 0    | 293  | 90   | 404  |
| 107  | 1    | 0    | 50   | 42   | 30   | 349  | 1    | 88   | 28   | 26   |
| 108  | 0    | 0    | 1    | 5    | 1    | 12   | 28   | 0    | 6    | 2    |
| 109  | 61   | 103  | 134  | 121  | 381  | 147  | 59   | 177  | 598  | 189  |
| 110  | 0    | 1    | 1    | 78   | 60   | 1    | 0    | 10   | 268  | 4    |
| 111  | 14   | 1    | 2    | 20   | 0    | 6    | 11   | 0    | 0    | 18   |
| 112  | 0    | 0    | 0    | 0    | 0    | 0    | 0    | 0    | 0    | 0    |
| 113  | 0    | 0    | 0    | 1    | 0    | 0    | 4    | 5166 | 4    | 4    |
| 114  | 0    | 0    | 0    | 0    | 0    | 0    | 0    | 0    | 0    | 1    |
| 115  | 0    | 0    | 1    | 0    | 0    | 7    | 0    | 10   | 0    | 0    |
| 116  | 0    | 0    | 0    | 3    | 0    | 3    | 0    | 2    | 0    | 10   |
| 117  | 0    | 0    | 0    | 2    | 0    | 0    | 1    | 0    | 0    | 0    |
| 118  | 0    | 0    | 0    | 0    | 0    | 0    | 0    | 1    | 0    | 0    |
| 119  | 0    | 12   | 0    | 3    | 0    | 0    | 0    | 0    | 0    | 1    |
| 120  | 605  | 0    | 0    | 0    | 0    | 351  | 0    | 0    | 0    | 0    |
| 121  | 1207 | 0    | 76   | 276  | 44   | 856  | 607  | 1149 | 383  | 33   |
| 122  | 23   | 1    | 0    | 91   | 0    | 0    | 1    | 243  | 309  | 117  |
| 123  | 49   | 0    | 0    | 4    | 0    | 28   | 16   | 2    | 0    | 6    |
| 124  | 0    | 0    | 0    | 18   | 0    | 2    | 0    | 0    | 0    | 0    |
| 125  | 164  | 1    | 72   | 196  | 10   | 820  | 26   | 85   | 594  | 113  |
| 126  | 105  | 0    | 172  | 674  | 321  | 218  | 445  | 305  | 1836 | 552  |
| 127  | 0    | 0    | 0    | 10   | 0    | 5    | 1    | 0    | 18   | 2    |
| 128  | 0    | 0    | 0    | 0    | 0    | 0    | 0    | 0    | 0    | 0    |
| 129  | 0    | 0    | 0    | 0    | 0    | 0    | 0    | 0    | 0    | 0    |
| 130  | 0    | 0    | 0    | 0    | 0    | 1    | 0    | 0    | 0    | 0    |
| 131  | 2    | 2    | 3680 | 1054 | 0    | 0    | 0    | 307  | 0    | 1    |

| CODE         | V.01        | V.03        | V.04        | V.06        | V.09        | V.10        | V.15        | V.19        | V.24        | V.26        |
|--------------|-------------|-------------|-------------|-------------|-------------|-------------|-------------|-------------|-------------|-------------|
| 132          | 88          | 1055        | 1629        | 620         | 0           | 81          | 12          | 122         | 234         | 13          |
| 133          | 345         | 2109        | 140         | 131         | 12          | 390         | 797         | 755         | 1104        | 53          |
| 134          | 0           | 8           | 0           | 0           | 0           | 0           | 0           | 0           | 0           | 0           |
| 135          | 0           | 0           | 0           | 0           | 0           | 0           | 0           | 0           | 0           | 0           |
| 136          | 3           | 24          | 6           | 5           | 0           | 3           | 2           | 3           | 3           | 0           |
| 137          | 375         | 7695        | 60          | 2825        | 16          | 25          | 8           | 15          | 55          | 634         |
| 138          | 1           | 6           | 2           | 125         | 1           | 1           | 0           | 2           | 2           | 2           |
| 139          | 0           | 6           | 1           | 0           | 0           | 1           | 0           | 0           | 2           | 0           |
| 140          | 5           | 0           | 0           | 0           | 0           | 0           | 0           | 0           | 0           | 0           |
| 141          | 3           | 0           | 1           | 2           | 0           | 0           | 0           | 0           | 1           | 0           |
| 142          | 1           | 0           | 1           | 0           | 0           | 0           | 0           | 0           | 0           | 0           |
| 143          | 0           | 0           | 0           | 0           | 0           | 0           | 0           | 0           | 0           | 0           |
| 144          | 0           | 0           | 1           | 1           | 0           | 0           | 0           | 0           | 0           | 0           |
| 145          | 0           | 0           | 0           | 0           | 0           | 3           | 0           | 0           | 0           | 0           |
| 146          | 0           | 0           | 0           | 0           | 0           | 1           | 0           | 0           | 0           | 0           |
| 147          | 0           | 0           | 0           | 0           | 0           | 20          | 0           | 0           | 0           | 0           |
| 148          | 0           | 0           | 0           | 0           | 0           | 0           | 0           | 0           | 0           | 0           |
| 149          | 0           | 0           | 4           | 0           | 0           | 0           | 0           | 0           | 0           | 0           |
| 150          | 106         | 0           | 0           | 270         | 429         | 591         | 0           | 0           | 71          | 210         |
| 151          | 0           | 0           | 0           | 0           | 0           | 0           | 0           | 0           | 0           | 0           |
| 152          | 0           | 2           | 0           | 1           | 2           | 3994        | 3837        | 0           | 2           | 0           |
|              |             |             |             |             |             |             |             |             |             |             |
|              |             |             |             |             |             |             |             |             |             |             |
| <b>LABEL</b> | <b>HIGH</b> | <b>HIGH</b> | <b>HIGH</b> | <b>HIGH</b> | <b>HIGH</b> | <b>HIGH</b> | <b>HIGH</b> | <b>HIGH</b> | <b>HIGH</b> | <b>HIGH</b> |

**Supplementary Table S4. Bacterial Counts in HIV-infected patients with having 5-10% of activated CD4(+) T cells (MEDIUM)**

| CODE | V.02 | V.05 | V.07 | V.11 | V.12 | V.13  | V.14 | V.16 | V.17 | V.18 | V.20 |
|------|------|------|------|------|------|-------|------|------|------|------|------|
| 1    | 52   | 0    | 0    | 96   | 14   | 16    | 2    | 156  | 0    | 34   | 0    |
| 2    | 4    | 0    | 0    | 0    | 0    | 0     | 0    | 0    | 0    | 0    | 0    |
| 3    | 3    | 11   | 0    | 0    | 12   | 1     | 10   | 20   | 0    | 23   | 12   |
| 4    | 0    | 0    | 0    | 0    | 0    | 0     | 0    | 0    | 2    | 0    | 0    |
| 5    | 0    | 0    | 0    | 0    | 0    | 0     | 0    | 1    | 0    | 0    | 0    |
| 6    | 264  | 64   | 0    | 84   | 336  | 2     | 39   | 7035 | 122  | 3031 | 2    |
| 7    | 0    | 0    | 0    | 0    | 0    | 0     | 0    | 0    | 0    | 0    | 0    |
| 8    | 0    | 0    | 0    | 0    | 0    | 0     | 0    | 0    | 0    | 0    | 0    |
| 9    | 4    | 3    | 3    | 4    | 4    | 6     | 0    | 4    | 5    | 4    | 1    |
| 10   | 0    | 0    | 1    | 0    | 0    | 0     | 0    | 1    | 0    | 0    | 0    |
| 11   | 0    | 2    | 4    | 1    | 15   | 1     | 0    | 1    | 0    | 6    | 1    |
| 12   | 0    | 0    | 0    | 0    | 0    | 0     | 0    | 0    | 0    | 0    | 0    |
| 13   | 0    | 0    | 2    | 0    | 2    | 0     | 4    | 1    | 0    | 2    | 1    |
| 14   | 31   | 8    | 1    | 682  | 156  | 61    | 141  | 660  | 104  | 198  | 16   |
| 15   | 0    | 0    | 0    | 1    | 0    | 0     | 0    | 25   | 0    | 0    | 0    |
| 16   | 25   | 0    | 16   | 4    | 20   | 34    | 36   | 115  | 28   | 21   | 9    |
| 17   | 34   | 811  | 28   | 133  | 42   | 72    | 54   | 38   | 125  | 127  | 3    |
| 18   | 0    | 0    | 0    | 4    | 0    | 0     | 0    | 0    | 0    | 0    | 0    |
| 19   | 0    | 0    | 0    | 0    | 0    | 8     | 0    | 0    | 0    | 0    | 0    |
| 20   | 5    | 38   | 0    | 13   | 6    | 0     | 24   | 121  | 4    | 12   | 3    |
| 21   | 186  | 66   | 120  | 1341 | 92   | 11862 | 128  | 2762 | 7906 | 180  | 101  |
| 22   | 50   | 0    | 0    | 43   | 0    | 35    | 0    | 35   | 0    | 2    | 0    |
| 23   | 5    | 0    | 0    | 28   | 8    | 12    | 3    | 17   | 25   | 0    | 0    |
| 24   | 1    | 11   | 0    | 9    | 0    | 67    | 0    | 7    | 10   | 1    | 3    |
| 25   | 172  | 32   | 49   | 923  | 24   | 289   | 5    | 485  | 38   | 5    | 10   |

| CODE | V.02  | V.05  | V.07  | V.11  | V.12 | V.13 | V.14  | V.16 | V.17 | V.18  | V.20  |
|------|-------|-------|-------|-------|------|------|-------|------|------|-------|-------|
| 26   | 0     | 0     | 0     | 0     | 0    | 0    | 0     | 0    | 0    | 0     | 0     |
| 27   | 159   | 0     | 124   | 73    | 325  | 1    | 520   | 0    | 193  | 2     | 1     |
| 28   | 16    | 0     | 0     | 0     | 9    | 1179 | 0     | 30   | 23   | 0     | 2     |
| 29   | 10912 | 22865 | 27491 | 12055 | 8284 | 2086 | 11683 | 60   | 4787 | 11926 | 24406 |
| 30   | 0     | 0     | 0     | 0     | 0    | 0    | 0     | 0    | 0    | 0     | 0     |
| 31   | 55    | 6     | 0     | 987   | 9    | 340  | 14    | 442  | 69   | 4     | 4     |
| 32   | 262   | 45    | 0     | 0     | 1055 | 46   | 70    | 0    | 630  | 11    | 67    |
| 33   | 254   | 987   | 697   | 746   | 624  | 253  | 217   | 58   | 339  | 34    | 5     |
| 34   | 330   | 0     | 0     | 0     | 83   | 98   | 19    | 0    | 65   | 333   | 0     |
| 35   | 3     | 0     | 0     | 0     | 121  | 0    | 6     | 0    | 492  | 0     | 8     |
| 36   | 1     | 14    | 17    | 0     | 0    | 5    | 1     | 136  | 0    | 0     | 0     |
| 37   | 165   | 1     | 0     | 0     | 0    | 0    | 147   | 0    | 0    | 0     | 0     |
| 38   | 2     | 1     | 0     | 0     | 0    | 0    | 0     | 2    | 2    | 1     | 0     |
| 39   | 0     | 0     | 0     | 0     | 0    | 0    | 0     | 1    | 0    | 0     | 0     |
| 40   | 0     | 2     | 2     | 0     | 4    | 5    | 1     | 8    | 0    | 0     | 13    |
| 41   | 3     | 9     | 40    | 22    | 9    | 7    | 2     | 12   | 7    | 9     | 6     |
| 42   | 0     | 0     | 0     | 0     | 0    | 0    | 1     | 0    | 0    | 0     | 0     |
| 43   | 2     | 0     | 2     | 1     | 3    | 1    | 0     | 3    | 5    | 3     | 2     |
| 44   | 3     | 1     | 8     | 30    | 0    | 1    | 6     | 1    | 3    | 229   | 0     |
| 45   | 5     | 2     | 106   | 32    | 362  | 2    | 6     | 2405 | 310  | 1121  | 192   |
| 46   | 0     | 0     | 0     | 0     | 0    | 0    | 0     | 0    | 0    | 0     | 0     |
| 47   | 0     | 1     | 0     | 0     | 0    | 0    | 0     | 19   | 1    | 3     | 0     |
| 48   | 0     | 4     | 20    | 315   | 0    | 2    | 0     | 10   | 7    | 18    | 3     |
| 49   | 0     | 0     | 2     | 0     | 0    | 0    | 3     | 3    | 2    | 1     | 1     |
| 50   | 0     | 6     | 0     | 4     | 2    | 1    | 1     | 8    | 33   | 5     | 0     |
| 51   | 5     | 74    | 44    | 89    | 202  | 52   | 48    | 232  | 119  | 1082  | 436   |
| 52   | 5     | 3     | 0     | 9     | 2    | 2    | 0     | 2    | 0    | 1     | 0     |

| CODE | V.02 | V.05 | V.07 | V.11 | V.12 | V.13 | V.14 | V.16 | V.17 | V.18 | V.20 |
|------|------|------|------|------|------|------|------|------|------|------|------|
| 53   | 936  | 209  | 0    | 124  | 280  | 70   | 63   | 184  | 130  | 29   | 3    |
| 54   | 138  | 2    | 0    | 80   | 39   | 780  | 52   | 155  | 68   | 361  | 103  |
| 55   | 0    | 0    | 0    | 0    | 8    | 0    | 8    | 0    | 2    | 4    | 0    |
| 56   | 0    | 0    | 0    | 1    | 0    | 4    | 0    | 0    | 0    | 0    | 0    |
| 57   | 0    | 0    | 0    | 0    | 0    | 0    | 0    | 0    | 0    | 0    | 0    |
| 58   | 0    | 0    | 0    | 0    | 0    | 0    | 0    | 0    | 0    | 0    | 0    |
| 59   | 0    | 0    | 0    | 0    | 0    | 0    | 1    | 2    | 0    | 0    | 0    |
| 60   | 0    | 0    | 0    | 0    | 0    | 0    | 0    | 1    | 0    | 0    | 0    |
| 61   | 43   | 13   | 0    | 242  | 16   | 9    | 5    | 363  | 37   | 6    | 2    |
| 62   | 1    | 0    | 3    | 38   | 22   | 1    | 12   | 110  | 17   | 18   | 2    |
| 63   | 22   | 168  | 13   | 39   | 91   | 1    | 5    | 98   | 21   | 14   | 1    |
| 64   | 258  | 237  | 386  | 928  | 597  | 350  | 164  | 2834 | 912  | 295  | 49   |
| 65   | 27   | 0    | 0    | 0    | 14   | 0    | 71   | 0    | 168  | 0    | 0    |
| 66   | 109  | 95   | 0    | 296  | 333  | 45   | 94   | 226  | 214  | 111  | 46   |
| 67   | 208  | 145  | 235  | 340  | 481  | 152  | 154  | 1188 | 240  | 178  | 26   |
| 68   | 12   | 0    | 0    | 0    | 20   | 0    | 13   | 21   | 31   | 2    | 2    |
| 69   | 2445 | 1626 | 297  | 2233 | 2777 | 1060 | 588  | 1462 | 3034 | 383  | 238  |
| 70   | 0    | 0    | 0    | 0    | 0    | 0    | 0    | 0    | 0    | 0    | 3    |
| 71   | 14   | 320  | 0    | 6    | 25   | 29   | 28   | 7    | 50   | 20   | 2    |
| 72   | 36   | 1    | 3    | 14   | 13   | 19   | 2    | 12   | 25   | 3    | 1    |
| 73   | 0    | 0    | 0    | 0    | 1    | 0    | 0    | 0    | 0    | 0    | 0    |
| 74   | 23   | 0    | 0    | 0    | 40   | 0    | 0    | 0    | 44   | 0    | 2    |
| 75   | 611  | 633  | 1722 | 128  | 888  | 713  | 715  | 922  | 385  | 2175 | 1069 |
| 76   | 149  | 373  | 16   | 195  | 69   | 352  | 171  | 28   | 219  | 123  | 50   |
| 77   | 0    | 0    | 0    | 0    | 0    | 0    | 0    | 0    | 0    | 0    | 0    |



| CODE | V.02  | V.05 | V.07 | V.11 | V.12 | V.13 | V.14 | V.16 | V.17 | V.18 | V.20 |
|------|-------|------|------|------|------|------|------|------|------|------|------|
| 78   | 7     | 0    | 0    | 3    | 0    | 0    | 0    | 0    | 0    | 0    | 0    |
| 79   | 17    | 2    | 0    | 0    | 16   | 0    | 4    | 685  | 43   | 0    | 0    |
| 80   | 557   | 649  | 0    | 289  | 23   | 2770 | 307  | 1271 | 56   | 315  | 1    |
| 81   | 0     | 0    | 0    | 1    | 0    | 0    | 0    | 1    | 37   | 0    | 0    |
| 82   | 0     | 0    | 0    | 0    | 0    | 2    | 0    | 0    | 0    | 0    | 0    |
| 83   | 472   | 59   | 1    | 1008 | 35   | 112  | 3    | 4    | 23   | 2    | 1    |
| 84   | 1553  | 880  | 292  | 542  | 518  | 1006 | 745  | 1239 | 831  | 248  | 430  |
| 85   | 1     | 2    | 1    | 8    | 0    | 6    | 0    | 6    | 15   | 0    | 0    |
| 86   | 10741 | 2620 | 18   | 3661 | 2287 | 1326 | 1009 | 1100 | 1267 | 1417 | 159  |
| 87   | 5     | 0    | 0    | 9    | 0    | 0    | 0    | 0    | 0    | 0    | 0    |
| 88   | 410   | 216  | 17   | 213  | 279  | 198  | 110  | 139  | 183  | 33   | 59   |
| 89   | 0     | 0    | 0    | 1    | 1    | 4    | 0    | 1    | 0    | 0    | 0    |
| 90   | 0     | 0    | 0    | 0    | 0    | 0    | 0    | 0    | 0    | 0    | 0    |
| 91   | 756   | 390  | 0    | 29   | 164  | 273  | 430  | 100  | 2543 | 79   | 13   |
| 92   | 516   | 187  | 1401 | 223  | 222  | 282  | 427  | 937  | 505  | 98   | 53   |
| 93   | 62    | 26   | 0    | 7    | 48   | 0    | 73   | 0    | 0    | 2    | 0    |
| 94   | 0     | 4    | 0    | 2    | 0    | 0    | 0    | 165  | 0    | 398  | 0    |
| 95   | 23    | 9    | 17   | 36   | 99   | 0    | 31   | 11   | 32   | 21   | 12   |
| 96   | 0     | 0    | 0    | 0    | 0    | 0    | 0    | 0    | 0    | 0    | 0    |
| 97   | 2896  | 2070 | 0    | 3672 | 3740 | 4093 | 412  | 1337 | 652  | 4150 | 274  |
| 98   | 0     | 0    | 0    | 0    | 0    | 0    | 0    | 0    | 0    | 0    | 0    |
| 99   | 0     | 0    | 0    | 157  | 213  | 0    | 57   | 0    | 3    | 1876 | 17   |
| 100  | 0     | 0    | 0    | 422  | 102  | 0    | 25   | 0    | 20   | 10   | 0    |
| 101  | 89    | 2    | 0    | 9    | 541  | 0    | 59   | 129  | 100  | 1    | 23   |
| 102  | 14    | 9    | 10   | 1    | 60   | 14   | 11   | 3    | 1    | 38   | 77   |
| 103  | 6     | 0    | 0    | 1    | 0    | 2    | 0    | 0    | 0    | 0    | 0    |
| 104  | 0     | 2    | 1    | 0    | 1    | 1    | 0    | 0    | 0    | 0    | 0    |

| CODE | V.02 | V.05 | V.07 | V.11 | V.12 | V.13 | V.14  | V.16 | V.17 | V.18 | V.20 |
|------|------|------|------|------|------|------|-------|------|------|------|------|
| 105  | 0    | 0    | 0    | 0    | 0    | 0    | 0     | 0    | 0    | 0    | 0    |
| 106  | 753  | 293  | 30   | 0    | 883  | 81   | 588   | 2867 | 1023 | 1236 | 68   |
| 107  | 116  | 43   | 5    | 451  | 11   | 2    | 48    | 1    | 62   | 24   | 2    |
| 108  | 0    | 1    | 0    | 8    | 0    | 0    | 0     | 1    | 0    | 0    | 1    |
| 109  | 668  | 115  | 71   | 1770 | 99   | 3    | 183   | 197  | 369  | 230  | 18   |
| 110  | 0    | 1    | 1    | 0    | 82   | 0    | 14    | 205  | 294  | 0    | 0    |
| 111  | 64   | 1    | 1    | 2    | 4    | 139  | 6     | 147  | 3    | 0    | 0    |
| 112  | 0    | 0    | 0    | 0    | 0    | 0    | 0     | 0    | 0    | 0    | 0    |
| 113  | 0    | 0    | 0    | 0    | 0    | 0    | 1     | 1    | 8    | 1    | 0    |
| 114  | 0    | 0    | 0    | 0    | 0    | 0    | 0     | 0    | 0    | 0    | 0    |
| 115  | 0    | 1    | 0    | 0    | 0    | 0    | 2     | 0    | 0    | 0    | 0    |
| 116  | 13   | 0    | 0    | 0    | 0    | 0    | 0     | 0    | 0    | 0    | 0    |
| 117  | 0    | 1    | 0    | 0    | 0    | 0    | 0     | 0    | 0    | 0    | 0    |
| 118  | 0    | 0    | 0    | 0    | 128  | 0    | 0     | 0    | 0    | 0    | 0    |
| 119  | 0    | 0    | 0    | 0    | 0    | 0    | 1     | 1    | 0    | 0    | 1    |
| 120  | 0    | 0    | 0    | 4    | 0    | 0    | 2     | 0    | 1    | 2    | 0    |
| 121  | 33   | 343  | 0    | 80   | 44   | 51   | 446   | 15   | 13   | 6    | 120  |
| 122  | 0    | 38   | 0    | 0    | 0    | 0    | 15    | 0    | 0    | 10   | 0    |
| 123  | 33   | 11   | 0    | 35   | 82   | 25   | 4     | 0    | 13   | 0    | 0    |
| 124  | 0    | 0    | 0    | 0    | 14   | 0    | 1     | 0    | 0    | 0    | 22   |
| 125  | 17   | 55   | 0    | 116  | 1    | 0    | 0     | 76   | 12   | 2    | 3    |
| 126  | 371  | 513  | 0    | 205  | 80   | 88   | 156   | 40   | 126  | 15   | 0    |
| 127  | 0    | 1    | 0    | 0    | 0    | 0    | 0     | 1    | 0    | 1    | 6    |
| 128  | 0    | 0    | 0    | 0    | 0    | 0    | 0     | 0    | 0    | 0    | 32   |
| 129  | 0    | 0    | 0    | 0    | 0    | 0    | 0     | 0    | 0    | 0    | 0    |
| 130  | 0    | 0    | 0    | 1    | 0    | 0    | 0     | 0    | 0    | 0    | 0    |
| 131  | 3303 | 1    | 0    | 0    | 1376 | 3    | 11444 | 1    | 2274 | 1076 | 26   |

| CODE         | V.02          | V.05          | V.07          | V.11          | V.12          | V.13          | V.14          | V.16          | V.17          | V.18          | V.20          |
|--------------|---------------|---------------|---------------|---------------|---------------|---------------|---------------|---------------|---------------|---------------|---------------|
| 132          | 34            | 11            | 64            | 11            | 12            | 167           | 1             | 39            | 150           | 226           | 7             |
| 133          | 51            | 25            | 537           | 251           | 37            | 1249          | 29            | 92            | 1725          | 116           | 33            |
| 134          | 0             | 0             | 0             | 0             | 0             | 0             | 0             | 0             | 0             | 0             | 0             |
| 135          | 0             | 0             | 0             | 3             | 0             | 0             | 0             | 0             | 0             | 0             | 0             |
| 136          | 1             | 0             | 2             | 0             | 0             | 9             | 0             | 1             | 26            | 2             | 0             |
| 137          | 24            | 319           | 7             | 1             | 1064          | 369           | 180           | 2             | 122           | 415           | 1463          |
| 138          | 0             | 1             | 0             | 0             | 0             | 42            | 7             | 1             | 0             | 0             | 29            |
| 139          | 0             | 0             | 0             | 0             | 1             | 0             | 0             | 0             | 0             | 0             | 0             |
| 140          | 0             | 0             | 0             | 0             | 0             | 0             | 0             | 0             | 0             | 0             | 0             |
| 141          | 0             | 0             | 0             | 0             | 1             | 2             | 1             | 1             | 1             | 0             | 0             |
| 142          | 0             | 1             | 0             | 0             | 0             | 0             | 1             | 0             | 0             | 0             | 0             |
| 143          | 1             | 0             | 0             | 1             | 0             | 0             | 1             | 0             | 2             | 1             | 0             |
| 144          | 1             | 0             | 0             | 0             | 0             | 0             | 0             | 0             | 1             | 0             | 0             |
| 145          | 4             | 0             | 0             | 0             | 0             | 22            | 1             | 0             | 0             | 0             | 0             |
| 146          | 0             | 0             | 0             | 1             | 2274          | 0             | 0             | 0             | 0             | 0             | 0             |
| 147          | 3             | 0             | 0             | 0             | 0             | 56            | 0             | 0             | 0             | 1             | 0             |
| 148          | 0             | 0             | 0             | 0             | 1             | 0             | 0             | 0             | 0             | 0             | 0             |
| 149          | 0             | 0             | 0             | 0             | 0             | 0             | 0             | 0             | 0             | 0             | 0             |
| 150          | 586           | 194           | 0             | 1060          | 35            | 0             | 17            | 0             | 65            | 1             | 1             |
| 151          | 5             | 0             | 0             | 0             | 0             | 0             | 0             | 0             | 0             | 0             | 0             |
| 152          | 24            | 2             | 0             | 0             | 0             | 35            | 1             | 4             | 0             | 19            | 0             |
|              |               |               |               |               |               |               |               |               |               |               |               |
|              |               |               |               |               |               |               |               |               |               |               |               |
| <b>LABEL</b> | <b>MEDIUM</b> | <b>MEDIUM</b> | <b>MEDIUM</b> | <b>MEDIUM</b> | <b>MEDIUM</b> | <b>MEDIUM</b> | <b>MEDIUM</b> | <b>MEDIUM</b> | <b>MEDIUM</b> | <b>MEDIUM</b> | <b>MEDIUM</b> |

**Supplementary Table S5. Bacterial Counts in HIV-infected patients with having less than 5 of activated CD4(+) T cells (LOW)**

| CODE | V.08 | V.23 | V.25  | V.27 |
|------|------|------|-------|------|
| 1    | 0    | 136  | 0     | 0    |
| 2    | 0    | 0    | 0     | 0    |
| 3    | 12   | 51   | 9     | 4    |
| 4    | 0    | 0    | 0     | 0    |
| 5    | 0    | 0    | 0     | 0    |
| 6    | 106  | 1    | 31    | 56   |
| 7    | 0    | 0    | 0     | 0    |
| 8    | 0    | 1    | 2     | 0    |
| 9    | 1    | 6    | 3     | 3    |
| 10   | 0    | 0    | 0     | 0    |
| 11   | 1    | 1    | 1     | 0    |
| 12   | 0    | 3    | 0     | 0    |
| 13   | 7    | 8    | 1     | 1    |
| 14   | 13   | 38   | 55    | 109  |
| 15   | 0    | 1    | 11    | 0    |
| 16   | 2    | 1    | 0     | 21   |
| 17   | 3    | 38   | 4     | 63   |
| 18   | 0    | 1    | 0     | 0    |
| 19   | 0    | 0    | 0     | 0    |
| 20   | 1    | 1    | 0     | 5    |
| 21   | 189  | 5233 | 21939 | 97   |
| 22   | 20   | 3    | 0     | 0    |
| 23   | 13   | 27   | 19    | 0    |
| 24   | 3    | 80   | 17    | 2    |
| 25   | 45   | 412  | 2535  | 44   |

| CODE | V.08  | V.23  | V.25 | V.27  |
|------|-------|-------|------|-------|
| 26   | 0     | 0     | 0    | 0     |
| 27   | 0     | 1438  | 0    | 43    |
| 28   | 2     | 0     | 0    | 0     |
| 29   | 24256 | 13480 | 2    | 30736 |
| 30   | 0     | 0     | 0    | 0     |
| 31   | 9     | 39    | 1126 | 7     |
| 32   | 28    | 2415  | 0    | 0     |
| 33   | 7     | 2     | 3    | 5     |
| 34   | 1     | 0     | 0    | 1     |
| 35   | 17    | 0     | 0    | 0     |
| 36   | 1     | 9     | 1    | 0     |
| 37   | 1     | 0     | 0    | 0     |
| 38   | 1     | 0     | 0    | 0     |
| 39   | 0     | 0     | 0    | 0     |
| 40   | 1     | 2     | 1    | 2     |
| 41   | 4     | 2     | 6    | 9     |
| 42   | 0     | 0     | 0    | 0     |
| 43   | 1     | 1     | 3    | 3     |
| 44   | 0     | 11    | 3    | 2     |
| 45   | 3     | 41    | 1    | 68    |
| 46   | 0     | 0     | 0    | 0     |
| 47   | 0     | 1     | 0    | 0     |
| 48   | 0     | 1     | 0    | 0     |
| 49   | 0     | 9     | 1    | 0     |
| 50   | 1     | 1     | 0    | 0     |
| 51   | 16    | 49    | 142  | 174   |
| 52   | 1     | 0     | 0    | 0     |

| CODE | V.08 | V.23 | V.25 | V.27 |
|------|------|------|------|------|
| 53   | 9    | 60   | 0    | 1    |
| 54   | 26   | 70   | 48   | 2660 |
| 55   | 0    | 0    | 0    | 0    |
| 56   | 0    | 0    | 0    | 0    |
| 57   | 0    | 0    | 0    | 0    |
| 58   | 0    | 0    | 0    | 0    |
| 59   | 0    | 0    | 0    | 0    |
| 60   | 0    | 0    | 0    | 0    |
| 61   | 3    | 15   | 4    | 0    |
| 62   | 0    | 4    | 0    | 10   |
| 63   | 17   | 23   | 32   | 6    |
| 64   | 259  | 97   | 171  | 114  |
| 65   | 90   | 0    | 0    | 0    |
| 66   | 71   | 19   | 15   | 45   |
| 67   | 76   | 94   | 29   | 106  |
| 68   | 0    | 1    | 0    | 0    |
| 69   | 1155 | 781  | 328  | 129  |
| 70   | 3    | 0    | 0    | 0    |
| 71   | 53   | 103  | 103  | 0    |
| 72   | 0    | 1    | 0    | 0    |
| 73   | 0    | 0    | 0    | 0    |
| 74   | 0    | 0    | 0    | 0    |
| 75   | 490  | 928  | 536  | 312  |
| 76   | 452  | 120  | 336  | 309  |
| 77   | 0    | 0    | 0    | 0    |

| CODE | V.08 | V.23 | V.25 | V.27 |
|------|------|------|------|------|
| 78   | 0    | 0    | 0    | 0    |
| 79   | 0    | 36   | 0    | 2    |
| 80   | 8    | 44   | 6    | 562  |
| 81   | 1    | 2    | 0    | 0    |
| 82   | 0    | 0    | 0    | 0    |
| 83   | 28   | 5    | 1    | 2    |
| 84   | 472  | 396  | 2    | 309  |
| 85   | 0    | 0    | 22   | 0    |
| 86   | 452  | 1239 | 92   | 29   |
| 87   | 0    | 0    | 0    | 0    |
| 88   | 199  | 57   | 120  | 17   |
| 89   | 2    | 1    | 0    | 0    |
| 90   | 0    | 0    | 0    | 0    |
| 91   | 458  | 97   | 79   | 5    |
| 92   | 64   | 110  | 172  | 67   |
| 93   | 20   | 3    | 0    | 0    |
| 94   | 0    | 6    | 722  | 0    |
| 95   | 7    | 4    | 5    | 23   |
| 96   | 0    | 0    | 0    | 0    |
| 97   | 594  | 1054 | 1    | 653  |
| 98   | 0    | 0    | 0    | 0    |
| 99   | 0    | 0    | 0    | 0    |
| 100  | 0    | 0    | 0    | 0    |
| 101  | 0    | 0    | 77   | 91   |
| 102  | 6    | 8    | 2    | 15   |
| 103  | 0    | 0    | 0    | 0    |
| 104  | 0    | 1    | 2    | 3    |

| CODE | V.08 | V.23 | V.25 | V.27 |
|------|------|------|------|------|
| 105  | 0    | 0    | 0    | 0    |
| 106  | 61   | 0    | 0    | 214  |
| 107  | 11   | 14   | 0    | 2    |
| 108  | 0    | 0    | 0    | 1    |
| 109  | 34   | 0    | 4    | 51   |
| 110  | 0    | 7    | 0    | 0    |
| 111  | 1    | 0    | 0    | 0    |
| 112  | 0    | 0    | 0    | 0    |
| 113  | 0    | 3    | 62   | 0    |
| 114  | 0    | 0    | 0    | 0    |
| 115  | 0    | 0    | 0    | 0    |
| 116  | 0    | 0    | 1    | 0    |
| 117  | 0    | 0    | 0    | 0    |
| 118  | 0    | 0    | 0    | 0    |
| 119  | 0    | 1    | 0    | 0    |
| 120  | 0    | 1513 | 0    | 0    |
| 121  | 288  | 30   | 942  | 476  |
| 122  | 2    | 0    | 0    | 5    |
| 123  | 0    | 0    | 0    | 0    |
| 124  | 0    | 0    | 0    | 0    |
| 125  | 4    | 77   | 144  | 0    |
| 126  | 12   | 0    | 0    | 7    |
| 127  | 676  | 0    | 0    | 6    |
| 128  | 0    | 0    | 0    | 0    |
| 129  | 0    | 0    | 0    | 0    |
| 130  | 0    | 0    | 0    | 0    |
| 131  | 0    | 1    | 1    | 610  |



| CODE         | V.08       | V.23       | V.25       | V.27       |
|--------------|------------|------------|------------|------------|
| 132          | 50         | 14         | 0          | 6          |
| 133          | 7          | 340        | 2          | 15         |
| 134          | 0          | 0          | 0          | 0          |
| 135          | 0          | 0          | 0          | 0          |
| 136          | 0          | 1          | 1          | 0          |
| 137          | 0          | 16         | 0          | 90         |
| 138          | 0          | 0          | 0          | 1          |
| 139          | 0          | 2          | 0          | 0          |
| 140          | 0          | 0          | 0          | 0          |
| 141          | 1          | 0          | 0          | 0          |
| 142          | 0          | 0          | 0          | 0          |
| 143          | 1          | 0          | 0          | 0          |
| 144          | 0          | 0          | 1          | 0          |
| 145          | 0          | 0          | 0          | 0          |
| 146          | 0          | 0          | 0          | 0          |
| 147          | 0          | 0          | 0          | 0          |
| 148          | 4          | 0          | 0          | 0          |
| 149          | 0          | 0          | 0          | 0          |
| 150          | 2          | 128        | 0          | 1          |
| 151          | 0          | 0          | 0          | 0          |
| 152          | 0          | 0          | 3657       | 4          |
|              |            |            |            |            |
|              |            |            |            |            |
| <b>LABEL</b> | <b>LOW</b> | <b>LOW</b> | <b>LOW</b> | <b>LOW</b> |

**Supplementary Table S6. Bacterial Counts in control group (< 5% of activated CD4(+) T cells)**

| CODE | C.01 | C.02 | C.04 | C.05 | C.09 | C.10 | C.14 | C.23  | C.24 | C.25  | C.26 | C.27 |
|------|------|------|------|------|------|------|------|-------|------|-------|------|------|
| 1    | 48   | 0    | 0    | 735  | 1    | 19   | 20   | 0     | 9    | 0     | 0    | 1    |
| 2    | 0    | 0    | 0    | 0    | 0    | 0    | 0    | 0     | 0    | 0     | 0    | 0    |
| 3    | 4    | 35   | 4    | 2    | 9    | 35   | 10   | 64    | 49   | 26    | 7    | 33   |
| 4    | 0    | 0    | 0    | 13   | 0    | 0    | 0    | 0     | 0    | 0     | 0    | 0    |
| 5    | 0    | 0    | 0    | 0    | 0    | 0    | 0    | 0     | 0    | 0     | 0    | 0    |
| 6    | 836  | 132  | 5    | 17   | 17   | 115  | 171  | 13772 | 69   | 847   | 113  | 1529 |
| 7    | 0    | 0    | 0    | 0    | 0    | 0    | 0    | 0     | 0    | 0     | 0    | 0    |
| 8    | 1    | 0    | 0    | 0    | 0    | 1    | 0    | 0     | 1    | 1     | 0    | 4    |
| 9    | 1    | 6    | 4    | 3    | 3    | 2    | 6    | 12    | 0    | 10    | 8    | 3    |
| 10   | 0    | 0    | 1    | 0    | 0    | 0    | 0    | 0     | 0    | 0     | 0    | 1    |
| 11   | 0    | 0    | 0    | 1    | 2    | 4    | 1    | 10    | 7    | 0     | 0    | 48   |
| 12   | 0    | 0    | 0    | 1    | 0    | 14   | 0    | 0     | 0    | 0     | 36   | 0    |
| 13   | 1    | 6    | 3    | 0    | 1    | 2    | 1    | 6     | 20   | 6     | 0    | 7    |
| 14   | 33   | 67   | 3    | 23   | 18   | 32   | 13   | 110   | 17   | 0     | 0    | 322  |
| 15   | 0    | 0    | 0    | 0    | 0    | 0    | 0    | 13    | 0    | 8     | 3    | 0    |
| 16   | 21   | 17   | 0    | 16   | 1    | 125  | 8    | 0     | 9    | 0     | 3    | 56   |
| 17   | 58   | 49   | 2    | 20   | 18   | 120  | 8    | 24    | 7    | 91    | 21   | 442  |
| 18   | 0    | 0    | 0    | 0    | 0    | 0    | 0    | 2     | 0    | 0     | 3    | 0    |
| 19   | 0    | 0    | 0    | 0    | 0    | 0    | 0    | 0     | 0    | 3     | 0    | 0    |
| 20   | 2    | 10   | 2    | 3    | 5    | 17   | 4    | 1     | 0    | 0     | 0    | 16   |
| 21   | 2252 | 1165 | 179  | 1746 | 80   | 7006 | 54   | 766   | 3552 | 22110 | 8418 | 239  |
| 22   | 61   | 4    | 0    | 0    | 2    | 1584 | 0    | 1     | 22   | 77    | 1041 | 1    |
| 23   | 12   | 33   | 0    | 5    | 0    | 50   | 3    | 2     | 13   | 86    | 97   | 44   |
| 24   | 47   | 9    | 0    | 36   | 1    | 57   | 1    | 0     | 7    | 0     | 309  | 1    |
| 25   | 354  | 94   | 0    | 18   | 18   | 2860 | 14   | 49    | 1295 | 1517  | 1426 | 69   |

| CODE | C.01 | C.02  | C.04  | C.05 | C.09  | C.10 | C.14  | C.23 | C.24  | C.25 | C.26 | C.27 |
|------|------|-------|-------|------|-------|------|-------|------|-------|------|------|------|
| 26   | 0    | 1     | 0     | 1    | 0     | 0    | 0     | 0    | 0     | 0    | 1    | 0    |
| 27   | 30   | 1836  | 261   | 649  | 973   | 0    | 614   | 0    | 793   | 0    | 0    | 306  |
| 28   | 1    | 60    | 0     | 0    | 0     | 1211 | 12    | 0    | 52    | 0    | 492  | 0    |
| 29   | 1944 | 15896 | 20795 | 4757 | 20068 | 8620 | 17566 | 6    | 11157 | 1    | 640  | 2716 |
| 30   | 0    | 0     | 0     | 0    | 0     | 0    | 10    | 0    | 0     | 0    | 0    | 0    |
| 31   | 37   | 105   | 0     | 13   | 1     | 428  | 4     | 21   | 207   | 3489 | 3265 | 30   |
| 32   | 1065 | 336   | 12    | 934  | 3     | 685  | 77    | 0    | 0     | 0    | 0    | 887  |
| 33   | 140  | 335   | 4     | 4    | 56    | 5    | 115   | 7    | 201   | 11   | 29   | 101  |
| 34   | 39   | 841   | 20    | 0    | 61    | 0    | 31    | 0    | 0     | 0    | 0    | 0    |
| 35   | 447  | 397   | 0     | 213  | 0     | 0    | 4     | 0    | 0     | 0    | 6    | 0    |
| 36   | 0    | 1     | 1     | 2    | 0     | 22   | 1     | 13   | 0     | 1    | 3    | 3    |
| 37   | 0    | 189   | 0     | 133  | 0     | 0    | 83    | 0    | 0     | 0    | 0    | 0    |
| 38   | 1    | 1     | 0     | 0    | 1     | 0    | 1     | 3    | 0     | 0    | 2    | 1    |
| 39   | 0    | 0     | 0     | 0    | 1     | 0    | 0     | 0    | 0     | 0    | 0    | 0    |
| 40   | 1    | 6     | 0     | 2    | 0     | 3    | 3     | 3    | 18    | 0    | 2    | 2    |
| 41   | 2    | 6     | 5     | 5    | 4     | 1    | 10    | 8    | 4     | 9    | 5    | 12   |
| 42   | 0    | 0     | 0     | 0    | 0     | 0    | 0     | 0    | 3     | 0    | 0    | 0    |
| 43   | 0    | 2     | 1     | 0    | 0     | 1    | 3     | 0    | 1     | 2    | 2    | 1    |
| 44   | 1    | 0     | 54    | 0    | 0     | 114  | 12    | 57   | 8     | 5    | 29   | 21   |
| 45   | 264  | 208   | 20    | 5    | 15    | 30   | 31    | 21   | 16    | 152  | 3    | 251  |
| 46   | 0    | 0     | 0     | 0    | 0     | 0    | 0     | 10   | 0     | 0    | 0    | 0    |
| 47   | 0    | 0     | 0     | 0    | 0     | 1    | 0     | 0    | 1     | 0    | 0    | 0    |
| 48   | 2    | 0     | 0     | 0    | 0     | 35   | 0     | 202  | 43    | 0    | 6    | 3    |
| 49   | 0    | 1     | 0     | 1    | 3     | 2    | 8     | 5    | 14    | 0    | 1    | 2    |
| 50   | 0    | 1     | 0     | 0    | 0     | 18   | 2     | 80   | 1     | 1    | 5    | 12   |
| 51   | 7    | 56    | 95    | 4    | 259   | 142  | 638   | 2219 | 5185  | 297  | 8    | 30   |
| 52   | 2    | 4     | 0     | 2    | 0     | 0    | 1     | 0    | 1     | 0    | 2    | 3    |

| CODE | C.01 | C.02 | C.04 | C.05 | C.09 | C.10 | C.14 | C.23 | C.24 | C.25 | C.26 | C.27 |
|------|------|------|------|------|------|------|------|------|------|------|------|------|
| 53   | 164  | 124  | 0    | 155  | 6    | 200  | 70   | 9    | 15   | 0    | 944  | 460  |
| 54   | 28   | 595  | 75   | 257  | 713  | 841  | 388  | 5    | 13   | 37   | 222  | 89   |
| 55   | 1    | 10   | 1    | 0    | 0    | 0    | 1    | 0    | 0    | 0    | 0    | 0    |
| 56   | 0    | 0    | 0    | 0    | 0    | 0    | 0    | 0    | 0    | 1    | 0    | 0    |
| 57   | 0    | 0    | 0    | 0    | 0    | 0    | 0    | 0    | 0    | 0    | 0    | 0    |
| 58   | 0    | 0    | 0    | 2    | 0    | 0    | 0    | 0    | 0    | 0    | 0    | 0    |
| 59   | 0    | 0    | 0    | 1    | 0    | 0    | 0    | 0    | 0    | 0    | 0    | 1    |
| 60   | 0    | 0    | 0    | 3    | 0    | 0    | 0    | 0    | 0    | 0    | 0    | 0    |
| 61   | 14   | 11   | 0    | 39   | 0    | 34   | 2    | 2    | 17   | 3    | 41   | 68   |
| 62   | 6    | 3    | 0    | 18   | 2    | 15   | 7    | 9    | 10   | 7    | 0    | 285  |
| 63   | 5    | 0    | 0    | 97   | 0    | 59   | 58   | 621  | 3    | 32   | 60   | 33   |
| 64   | 171  | 170  | 21   | 58   | 21   | 383  | 92   | 943  | 57   | 151  | 318  | 1339 |
| 65   | 0    | 568  | 0    | 260  | 0    | 0    | 29   | 1    | 2    | 0    | 3    | 264  |
| 66   | 89   | 195  | 3    | 56   | 60   | 434  | 28   | 10   | 38   | 57   | 93   | 1023 |
| 67   | 94   | 79   | 7    | 50   | 34   | 186  | 27   | 1048 | 72   | 186  | 46   | 876  |
| 68   | 1    | 10   | 0    | 10   | 0    | 14   | 2    | 0    | 1    | 0    | 0    | 20   |
| 69   | 422  | 851  | 35   | 555  | 288  | 1307 | 607  | 2670 | 268  | 276  | 1749 | 1402 |
| 70   | 0    | 0    | 0    | 0    | 0    | 0    | 0    | 0    | 0    | 0    | 0    | 0    |
| 71   | 10   | 30   | 76   | 19   | 22   | 72   | 54   | 0    | 137  | 9    | 24   | 14   |
| 72   | 5    | 1    | 0    | 2    | 0    | 16   | 0    | 4    | 0    | 0    | 5    | 14   |
| 73   | 0    | 0    | 0    | 0    | 0    | 0    | 0    | 0    | 0    | 0    | 0    | 0    |
| 74   | 14   | 53   | 1    | 0    | 1    | 169  | 31   | 1    | 3    | 0    | 0    | 0    |
| 75   | 866  | 322  | 107  | 667  | 158  | 641  | 68   | 4    | 369  | 200  | 465  | 4374 |
| 76   | 22   | 92   | 37   | 276  | 109  | 492  | 13   | 1    | 468  | 18   | 313  | 123  |
| 77   | 0    | 0    | 0    | 0    | 0    | 0    | 0    | 0    | 0    | 0    | 0    | 0    |

| CODE | C.01 | C.02 | C.04 | C.05 | C.09 | C.10 | C.14 | C.23 | C.24 | C.25 | C.26 | C.27 |
|------|------|------|------|------|------|------|------|------|------|------|------|------|
| 78   | 4    | 0    | 0    | 3    | 0    | 0    | 0    | 0    | 0    | 0    | 0    | 0    |
| 79   | 47   | 41   | 0    | 55   | 1    | 90   | 0    | 0    | 7    | 0    | 7    | 581  |
| 80   | 3    | 196  | 17   | 260  | 368  | 757  | 117  | 316  | 16   | 62   | 289  | 18   |
| 81   | 1    | 0    | 0    | 1    | 0    | 0    | 0    | 0    | 0    | 0    | 0    | 4    |
| 82   | 0    | 0    | 0    | 0    | 0    | 0    | 0    | 0    | 0    | 0    | 2    | 0    |
| 83   | 635  | 204  | 0    | 381  | 0    | 145  | 4    | 0    | 17   | 22   | 100  | 128  |
| 84   | 95   | 753  | 54   | 448  | 200  | 743  | 349  | 716  | 333  | 210  | 626  | 4992 |
| 85   | 3    | 1    | 0    | 0    | 0    | 7    | 2    | 3    | 0    | 84   | 2    | 0    |
| 86   | 3678 | 2504 | 17   | 2597 | 209  | 4467 | 557  | 181  | 1467 | 925  | 3653 | 4213 |
| 87   | 0    | 0    | 0    | 0    | 0    | 0    | 0    | 0    | 0    | 0    | 0    | 0    |
| 88   | 45   | 70   | 0    | 118  | 26   | 469  | 24   | 1454 | 41   | 149  | 180  | 535  |
| 89   | 0    | 2    | 0    | 2    | 0    | 0    | 0    | 0    | 0    | 0    | 3    | 0    |
| 90   | 0    | 0    | 0    | 0    | 0    | 0    | 0    | 0    | 0    | 0    | 1    | 0    |
| 91   | 172  | 697  | 0    | 325  | 11   | 85   | 152  | 3    | 12   | 235  | 964  | 441  |
| 92   | 188  | 117  | 3    | 65   | 47   | 389  | 243  | 3504 | 62   | 334  | 528  | 1343 |
| 93   | 11   | 58   | 0    | 139  | 0    | 30   | 4    | 0    | 0    | 0    | 28   | 12   |
| 94   | 0    | 0    | 7    | 0    | 35   | 0    | 15   | 88   | 529  | 1722 | 0    | 61   |
| 95   | 2    | 13   | 1    | 11   | 13   | 15   | 5    | 4    | 86   | 18   | 5    | 19   |
| 96   | 0    | 0    | 977  | 0    | 188  | 0    | 3    | 0    | 0    | 0    | 0    | 0    |
| 97   | 4    | 1164 | 196  | 1    | 1234 | 671  | 140  | 233  | 1376 | 342  | 0    | 1968 |
| 98   | 0    | 0    | 41   | 0    | 0    | 0    | 0    | 0    | 0    | 0    | 0    | 0    |
| 99   | 1502 | 1    | 282  | 0    | 1018 | 0    | 148  | 2    | 63   | 303  | 0    | 177  |
| 100  | 15   | 142  | 11   | 0    | 70   | 0    | 3    | 0    | 0    | 0    | 0    | 39   |
| 101  | 174  | 7    | 27   | 224  | 10   | 1    | 36   | 4    | 0    | 88   | 1779 | 137  |
| 102  | 6    | 26   | 143  | 9    | 142  | 66   | 628  | 107  | 221  | 15   | 12   | 20   |
| 103  | 0    | 0    | 0    | 0    | 0    | 0    | 0    | 0    | 0    | 0    | 10   | 0    |
| 104  | 0    | 2    | 2    | 1    | 1    | 1    | 2    | 4    | 0    | 4    | 1    | 2    |

| CODE | C.01  | C.02 | C.04 | C.05  | C.09 | C.10 | C.14 | C.23 | C.24 | C.25 | C.26 | C.27 |
|------|-------|------|------|-------|------|------|------|------|------|------|------|------|
| 105  | 0     | 237  | 0    | 0     | 0    | 0    | 0    | 1    | 0    | 0    | 0    | 0    |
| 106  | 576   | 177  | 346  | 86    | 30   | 0    | 79   | 181  | 183  | 0    | 0    | 756  |
| 107  | 0     | 35   | 0    | 13    | 0    | 24   | 14   | 1414 | 0    | 4    | 114  | 46   |
| 108  | 1     | 1    | 0    | 0     | 0    | 1    | 0    | 0    | 1    | 0    | 3    | 0    |
| 109  | 127   | 123  | 14   | 88    | 12   | 116  | 22   | 25   | 18   | 2    | 8    | 489  |
| 110  | 34    | 16   | 1    | 7     | 26   | 72   | 5    | 3    | 12   | 2    | 0    | 351  |
| 111  | 2     | 1    | 6    | 29    | 5    | 1    | 36   | 2    | 0    | 1    | 20   | 1    |
| 112  | 0     | 0    | 0    | 0     | 0    | 0    | 10   | 0    | 0    | 0    | 0    | 17   |
| 113  | 0     | 0    | 12   | 1     | 0    | 0    | 4    | 2    | 225  | 0    | 0    | 2    |
| 114  | 0     | 0    | 0    | 0     | 0    | 0    | 5    | 0    | 0    | 0    | 0    | 0    |
| 115  | 0     | 0    | 0    | 0     | 0    | 0    | 0    | 0    | 0    | 0    | 1    | 0    |
| 116  | 0     | 5    | 0    | 14    | 0    | 0    | 0    | 0    | 0    | 0    | 0    | 0    |
| 117  | 0     | 0    | 0    | 0     | 0    | 0    | 0    | 0    | 0    | 0    | 0    | 0    |
| 118  | 16    | 110  | 0    | 0     | 0    | 0    | 0    | 0    | 0    | 0    | 21   | 0    |
| 119  | 0     | 0    | 0    | 0     | 0    | 0    | 0    | 0    | 0    | 0    | 0    | 0    |
| 120  | 0     | 0    | 0    | 1     | 0    | 11   | 0    | 0    | 15   | 0    | 0    | 0    |
| 121  | 14    | 30   | 284  | 238   | 21   | 195  | 31   | 124  | 197  | 1819 | 75   | 25   |
| 122  | 0     | 0    | 0    | 313   | 32   | 3    | 7    | 0    | 0    | 0    | 0    | 0    |
| 123  | 14    | 6    | 0    | 19    | 0    | 0    | 0    | 0    | 0    | 0    | 12   | 1    |
| 124  | 0     | 0    | 0    | 0     | 0    | 0    | 2    | 0    | 0    | 0    | 0    | 0    |
| 125  | 18    | 12   | 0    | 8     | 4    | 19   | 0    | 0    | 16   | 319  | 301  | 11   |
| 126  | 123   | 597  | 2    | 28    | 10   | 14   | 46   | 2    | 597  | 9    | 982  | 538  |
| 127  | 2     | 0    | 0    | 0     | 1    | 0    | 3    | 0    | 2    | 0    | 1    | 0    |
| 128  | 0     | 0    | 0    | 0     | 0    | 0    | 0    | 0    | 0    | 0    | 0    | 0    |
| 129  | 8     | 0    | 0    | 0     | 0    | 0    | 0    | 0    | 0    | 0    | 0    | 0    |
| 130  | 0     | 0    | 0    | 4318  | 0    | 0    | 0    | 0    | 0    | 0    | 0    | 0    |
| 131  | 12532 | 6691 | 4967 | 10271 | 1423 | 2    | 353  | 2    | 0    | 3    | 0    | 273  |

| CODE         | C.01    | C.02    | C.04    | C.05    | C.09    | C.10    | C.14    | C.23    | C.24    | C.25    | C.26    | C.27    |
|--------------|---------|---------|---------|---------|---------|---------|---------|---------|---------|---------|---------|---------|
| 132          | 4       | 31      | 47      | 2       | 39      | 374     | 688     | 553     | 700     | 6       | 186     | 2       |
| 133          | 21      | 134     | 19      | 633     | 32      | 619     | 2163    | 5478    | 122     | 40      | 1247    | 35      |
| 134          | 0       | 0       | 0       | 0       | 0       | 0       | 79      | 0       | 0       | 0       | 0       | 0       |
| 135          | 0       | 0       | 0       | 0       | 0       | 0       | 0       | 0       | 0       | 0       | 0       | 0       |
| 136          | 0       | 1       | 0       | 0       | 0       | 11      | 43      | 23      | 4       | 0       | 4       | 0       |
| 137          | 4       | 63      | 1936    | 20      | 1862    | 121     | 4012    | 129     | 534     | 1       | 452     | 46      |
| 138          | 1       | 0       | 25      | 0       | 22      | 2       | 151     | 0       | 22      | 0       | 1       | 0       |
| 139          | 0       | 2       | 2       | 0       | 0       | 3       | 0       | 1       | 0       | 0       | 0       | 1       |
| 140          | 0       | 0       | 0       | 0       | 0       | 0       | 0       | 0       | 0       | 0       | 0       | 0       |
| 141          | 0       | 3       | 0       | 0       | 0       | 1       | 1       | 2       | 0       | 1       | 1       | 0       |
| 142          | 1       | 0       | 0       | 0       | 0       | 0       | 0       | 0       | 1       | 0       | 1       | 0       |
| 143          | 0       | 0       | 0       | 0       | 0       | 0       | 2       | 0       | 1       | 0       | 1       | 0       |
| 144          | 0       | 0       | 0       | 0       | 0       | 0       | 0       | 0       | 0       | 0       | 1       | 1       |
| 145          | 9       | 0       | 0       | 188     | 0       | 0       | 0       | 0       | 0       | 0       | 1       | 0       |
| 146          | 0       | 0       | 0       | 0       | 0       | 0       | 0       | 0       | 0       | 0       | 0       | 1       |
| 147          | 0       | 0       | 0       | 0       | 0       | 0       | 0       | 3       | 0       | 0       | 0       | 0       |
| 148          | 0       | 0       | 0       | 1       | 0       | 0       | 0       | 0       | 0       | 0       | 0       | 0       |
| 149          | 0       | 0       | 0       | 0       | 0       | 0       | 0       | 0       | 0       | 0       | 0       | 0       |
| 150          | 858     | 75      | 0       | 61      | 0       | 4       | 10      | 0       | 0       | 0       | 105     | 439     |
| 151          | 0       | 0       | 0       | 0       | 0       | 0       | 0       | 0       | 0       | 0       | 0       | 0       |
| 152          | 1       | 0       | 0       | 94      | 1       | 71      | 0       | 131     | 0       | 1       | 1747    | 1       |
|              |         |         |         |         |         |         |         |         |         |         |         |         |
|              |         |         |         |         |         |         |         |         |         |         |         |         |
| <b>LABEL</b> | Control | Control | Control | Control | Control | Control | Control | Control | Control | Control | Control | Control |

**Supplementary Table S7. Tukey least significance difference test comparing the % of activated CD4(+) T cells by HIV-infected group.**

| <b>Groups</b>      | <b>Difference</b> | <b>95%CI</b>       | <b>P</b>           |
|--------------------|-------------------|--------------------|--------------------|
| Medium vs. High    | -9.465            | (-13.134, -5.7949) | <b>&lt;0.00001</b> |
| Low vs. High       | -13.635           | (-18.603, -8.6663) | <b>&lt;0.00001</b> |
| Control vs. High   | -13.385           | (-16.981, -9.7889) | <b>&lt;0.00001</b> |
| Low vs. Medium     | -4.170            | (-9.0741, 0.73321) | 0.119              |
| Control vs. Medium | -3.920            | (-7.4261, -0.4147) | <b>0.024</b>       |
| Control vs. Low    | 0.250             | (-4.5988, 5.09887) | 0.999              |

Conventions as in Figure 3A of the main manuscript.



**Supplementary Table S8. Hits with having the adjusted P values < 0.05 after MetagenomeSeq analysis between Control group and HIV-infected group**

| Family                     | Genus                | F          | P          | Adjusted P |
|----------------------------|----------------------|------------|------------|------------|
| Lachnospiraceae            | Incertae_Sedis       | 21.2078968 | 1.0877E-06 | 0.0001675  |
| Lachnospiraceae            | Blautia              | 18.9666402 | 3.0257E-06 | 0.00022861 |
| Veillonellaceae            | Veillonella          | 18.1545952 | 4.4535E-06 | 0.00022861 |
| Lachnospiraceae            | Dorea                | 12.7155631 | 7.6708E-05 | 0.00295326 |
| Enterobacteriaceae         | Escherichia-Shigella | 11.1999067 | 0.00018623 | 0.00573583 |
| Ruminococcaceae            | Faecalibacterium     | 10.7837297 | 0.00023959 | 0.00614938 |
| Corynebacteriaceae         | Corynebacterium      | 8.59304841 | 0.00096387 | 0.01508861 |
| Staphylococcaceae          | Staphylococcus       | 8.77304486 | 0.00085589 | 0.01508861 |
| Ruminococcaceae            | g                    | 8.56834664 | 0.00097978 | 0.01508861 |
| Ruminococcaceae            | Subdoligranulum      | 8.37904194 | 0.00111133 | 0.01555867 |
| Streptococcaceae           | Streptococcus        | 7.91041585 | 0.00152433 | 0.01956227 |
| Pasteurellaceae            | Actinobacillus       | 7.78096423 | 0.00166513 | 0.01972533 |
| Rickettsiales_mitochondria | g                    | 7.33338919 | 0.00226815 | 0.02494962 |
| Enterobacteriaceae         | Enterobacter         | 6.79073394 | 0.00332491 | 0.03413574 |
| Erysipelotrichaceae        | Incertae_Sedis       | 6.23360347 | 0.00496973 | 0.04783362 |
| Lachnospiraceae            | Shuttleworthia       | 6.09954775 | 0.00548228 | 0.04966303 |

Highlighted in yellow are those genera identified in the sPLS-DA signature

**Supplementary Table S9. Top-half of the hits with having the adjusted P values < 0.05 after MetagenomeSeq analysis between Control group and HIV-infected subgroup with HIGH % activated CD4(+) T cells**

| Family                | Genus                | F          | P          | Adjusted P |
|-----------------------|----------------------|------------|------------|------------|
| Lachnospiraceae       | Incertae_Sedis       | 92,8999628 | 1,9168E-14 | 2,9518E-12 |
| Lachnospiraceae       | Blautia              | 59,7686836 | 8,1982E-12 | 6,3126E-10 |
| Lachnospiraceae       | Dorea                | 41,404943  | 8,315E-10  | 4,2684E-08 |
| Ruminococcaceae       | Faecalibacterium     | 36,4985052 | 3,6644E-09 | 1,4108E-07 |
| Lachnospiraceae       | Pseudobutyrvibrio    | 35,0729114 | 5,7849E-09 | 1,7817E-07 |
| Veillonellaceae       | Veillonella          | 31,5716447 | 1,8767E-08 | 4,8169E-07 |
| Ruminococcaceae       | Subdoligranulum      | 29,4792315 | 3,9517E-08 | 7,6071E-07 |
| Ruminococcaceae       | g                    | 28,1246568 | 6,5167E-08 | 1,1151E-06 |
| Staphylococcaceae     | Staphylococcus       | 26,0620322 | 1,4378E-07 | 2,2143E-06 |
| Lachnospiraceae       | Roseburia            | 25,1993636 | 2,0248E-07 | 2,8347E-06 |
| Corynebacteriaceae    | Corynebacterium      | 23,8089322 | 3,569E-07  | 4,5802E-06 |
| Streptococcaceae      | Streptococcus        | 23,074759  | 4,8522E-07 | 5,748E-06  |
| Enterobacteriaceae    | Escherichia-Shigella | 21,9533261 | 7,8434E-07 | 8,6278E-06 |
| Alcaligenaceae        | Sutterella           | 20,0713289 | 1,8132E-06 | 1,8616E-05 |
| Bacteroidaceae        | Bacteroides          | 19,4970641 | 2,3616E-06 | 2,273E-05  |
| Ruminococcaceae       | Incertae_Sedis       | 18,3779986 | 4,0007E-06 | 3,6241E-05 |
| Peptostreptococcaceae | Incertae_Sedis       | 15,9014866 | 1,3669E-05 | 0,00011694 |
| Actinomycetaceae      | Actinomyces          | 15,7345564 | 1,4898E-05 | 0,00012075 |
| Pasteurellaceae       | Actinobacillus       | 15,5249466 | 1,661E-05  | 0,0001279  |
| Enterobacteriaceae    | Enterobacter         | 13,7640698 | 4,2633E-05 | 0,00031264 |
| Erysipelotrichaceae   | Incertae_Sedis       | 13,6022244 | 4,6617E-05 | 0,00032632 |
| Clostridiaceae        | Clostridium          | 13,0542316 | 6,331E-05  | 0,0004239  |
| Lachnospiraceae       | Lachnospira          | 11,7263751 | 0,00013612 | 0,00087346 |
| Prevotellaceae        | Prevotella           | 11,3213833 | 0,00017315 | 0,00106192 |

Highlighted in yellow are those genera identified in the sPLS-DA signature
